# Supplementary material
Source: Elsevier journal article supplement (https://www.sciencedirect.com/science/article/pii/S2529993X20300344)
Supplement: mmc1 [file S2529993X20300344:mmc1.pdf]

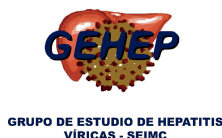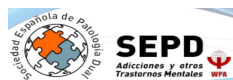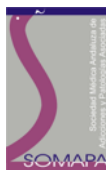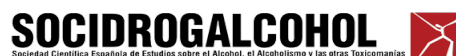

**DOCUMENTO DE CONSENSO DE GEHEP, PERTENECIENTE A LA SOCIEDAD ESPAÑOLA DE ENFERMEDADES INFECCIOSAS Y MICROBIOLOGÍA CLÍNICA (SEIMC), JUNTO CON SOCIDROGALCOHOL, SEPD Y SOMAPA, SOBRE EL MANEJO DE LA INFECCIÓN POR VHC EN USUARIOS DE DROGAS.**

**Panel de elaboración:** Benjamín Climent, Federico García, Miguel García Deltoro, Rafael Granados, Fernanda Gómez, Juan Macías, Álvaro Mena, Nicolás Merchante, Luis Morano, Enriqueta Ochoa, Juan A. Pineda, Carlos Roncero, Juan Jesús Ruiz, Francisco Téllez.

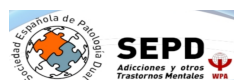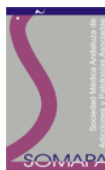

## ÍNDICE

|                                                                                                                                                            |    |
|------------------------------------------------------------------------------------------------------------------------------------------------------------|----|
| 1. <b><u>SOCIEDADES PARTICIPANTES</u></b> .....                                                                                                            | 3  |
| 2. <b><u>AFILIACIÓN DEL PANEL DE EXPERTOS</u></b> .....                                                                                                    | 3  |
| 3. <b><u>CONFLICTOS DE INTERÉS</u></b> .....                                                                                                               | 5  |
| 4. <b><u>AGRADECIMIENTOS</u></b> .....                                                                                                                     | 8  |
| 5. <b><u>ABREVIATURAS</u></b> .....                                                                                                                        | 9  |
| 6. <b><u>INTRODUCCIÓN</u></b> .....                                                                                                                        | 10 |
| 7. <b><u>METODOLOGÍA</u></b> .....                                                                                                                         | 12 |
| 8. <b><u>MEDIDAS GENERALES DE MANEJO DEL PACIENTE UD INFECTADO POR VHC</u></b> .....                                                                       | 13 |
| 9. <b><u>CRIBADO DE LA INFECCIÓN POR VHC EN PACIENTES UD</u></b> .....                                                                                     | 18 |
| 10. <b><u>INTERACCIÓN ENTRE HOSPITAL Y CENTROS DE ADICCIONES EN EL MANEJO DE LA INFECCIÓN POR VHC EN UD. VINCULACIÓN Y ADHERENCIA AL CUIDADO</u></b> ..... | 25 |
| 11. <b><u>TRATAMIENTO FARMACOLÓGICO DE LA HEPATITIS C EN EL PACIENTE UD</u></b> 30                                                                         |    |
| 12. <b><u>INTERACCIONES FARMACOLÓGICAS ENTRE LOS AAD Y FÁRMACOS DE USO COMÚN EN UD. INTERACCIONES DE LOS AAD CON DROGAS DE USO ILEGAL</u></b> .....        | 46 |
| 13. <b><u>REDUCCIÓN DE RIESGO Y PREVENCIÓN DE LA REINFECCIÓN POR VHC</u></b> 64                                                                            |    |
| 14. <b><u>REFERENCIAS BIBLIOGRÁFICAS</u></b> .....                                                                                                         | 73 |

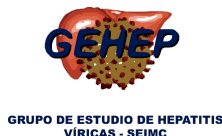

## **1. SOCIEDADES PARTICIPANTES**

- Grupo de Estudio de las Hepatitis Víricas (**GEHEP**)/Sociedad Española de Enfermedades Infecciosas y Microbiología Clínica (**SEIMC**), como sociedad, promotor del documento.  
<http://seimc.org/grupodeestudio.php?Grupo=GEHEP/>  
<http://www.seimc.org/>
- Sociedad Científica Española de Estudios sobre el Alcohol, el Alcoholismo y las otras Toxicomanías (**SOCIDROGALCOHOL**).  
<http://www.socidrogalcohol.org/>
- Sociedad Española de Patología Dual (**SEPD**).  
<http://www.patologiadual.es/>
- Sociedad Médica Andaluza de Adicciones y Patologías Asociadas (**SOMAPA**). <http://www.somapa.es/>

## **2. AFILIACIÓN DEL PANEL DE EXPERTOS**

- Benjamín Climent. Unidad Toxicología Clínica. Servicio Medicina Interna. Consorcio Hospital General Universitario. Valencia. [climentb@gmail.com](mailto:climentb@gmail.com)
- Federico García. Departamento de Microbiología Clínica, Hospital Universitario San Cecilio, Granada. [fegarcia@ugr.es](mailto:fegarcia@ugr.es)

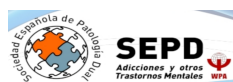

- Miguel García Deltoro. Unidad Enfermedades Infecciosas. Consorcio Hospital General Universitario de Valencia. [gdeltoromiguel@gmail.com](mailto:gdeltoromiguel@gmail.com)
- Rafael Granados. Servicio de Medicina Interna. Unidad de Enfermedades Infecciosas. Hospital Universitario de Gran Canaria Dr. Negrín. Las Palmas. [rafagramon@gmail.com](mailto:rafagramon@gmail.com)
- Fernanda Gómez. Centro de Atención de Adicciones de Marbella. Ayuntamiento de Marbella. [nandagomez@hotmail.com](mailto:nandagomez@hotmail.com)
- Juan Macías. Unidad de Enfermedades Infecciosas y Microbiología. Hospital Universitario de Valme. Sevilla. [juan.macias.sanchez@gmail.com](mailto:juan.macias.sanchez@gmail.com)
- Álvaro Mena. Servicio de Medicina Interna. Complejo Hospitalario Universitario de A Coruña (CHUA). [alvaro.mena.de.cea@sergas.es](mailto:alvaro.mena.de.cea@sergas.es)
- Luis Morano. Unidad de Patología Infecciosa. Hospital Universitario Álvaro Cunqueiro. Instituto de Investigación Sanitaria Galicia Sur. Vigo. [luis.morano.amado@gmail.com](mailto:luis.morano.amado@gmail.com)
- Nicolás Merchante. Unidad de Enfermedades Infecciosas y Microbiología. Hospital Universitario de Valme. Sevilla [nicolasmerchante@gmail.com](mailto:nicolasmerchante@gmail.com)
- Enriqueta Ochoa. Departamento de Psiquiatría. Hospital Universitario Ramón y Cajal (IRYCIS). Universidad de Alcalá. Madrid. [enriquetaochoam@gmail.com](mailto:enriquetaochoam@gmail.com)
- Juan A. Pineda. Unidad de Enfermedades Infecciosas y Microbiología. Hospital Universitario de Valme. Sevilla. [japineda@telefonica.net](mailto:japineda@telefonica.net)

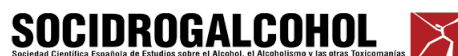

- Carlos Roncero. Servicio de Psiquiatría. Complejo Asistencial Universitario de Salamanca (España). Instituto de Biomedicina de Salamanca. Departamento de Psiquiatría. Universidad de Salamanca, (España). [croncero@saludcastillayleon.es](mailto:croncero@saludcastillayleon.es)
- Juan Jesús Ruiz. Centro Provincial de Drogodependencias y otras Adicciones de Málaga. Diputación Provincial de Málaga. [jjruiz@malaga.es](mailto:jjruiz@malaga.es)
- Francisco Téllez. UGC Enfermedades Infecciosas y Microbiología, Hospital Universitario de Puerto Real. Facultad de Medicina, Universidad de Cádiz. Instituto de Investigación e Innovación en Ciencias Biomédicas de la Provincia de Cádiz (INiBICA). [francisco.tellez.perez@gmail.com](mailto:francisco.tellez.perez@gmail.com)

### 3. **CONFLICTOS DE INTERÉS**

- Benjamín Climent ha sido beneficiario de ayudas para proyectos de investigación de Pfizer y ha recibido honorarios por ponencias de Lundbeck, Pfizer y Reckitt.
- Federico García ha sido beneficiario de ayudas para proyectos de investigación de Gilead y Roche, ha recibido honorarios por ponencias de ViiV, Gilead, Abbvie, MSD, Janssen, Roche, Biomerieux, Hologic, Qiagen, ha percibido ayudas para asistencia a actividades formativas de ViiV, Gilead, Abbvie, MSD, Janssen, Roche, Biomerieux, Hologic, Qiagen, y ha



realizado labores de asesoramiento para ViiV, Gilead, Abbvie, Roche y Hologic.

- Miguel García Deltoro ha sido beneficiario de ayudas para proyectos de investigación de Janssen, ViiV, Gilead y MSD, ha recibido honorarios por ponencias de Janssen, ViiV, Gilead, Abbvie y MSD ha percibido ayudas para asistencia a actividades formativas de MSD y Gilead y ha realizado labores de asesoramiento para Janssen, ViiV y Gilead.
- Rafael Granados ha recibido honorarios por ponencias de Abbvie, Gilead, Janssen y MSD, ha percibido ayudas para asistencia a actividades formativas de Janssen, Gilead, Abbvie y MSD y ha realizado labores de asesoramiento para Abbvie y Janssen.
- Fernanda Gómez ha sido beneficiaria de ayudas para proyectos de investigación de Schering-Plough, ha recibido honorarios por ponencias de Reckitt-Benckiser y ha percibido ayudas para asistencia a actividades formativas de Reckitt-Benckiser/Indivior, Lilly, Lundbeck, Pfizer, Janssen y Gilead.
- Juan Macías ha sido beneficiario de ayudas para proyectos de investigación de Abbvie, Janssen, Gilead, MSD y ViiV, ha recibido honorarios por ponencias de Gilead y MSD, ha percibido ayudas para asistencia a actividades formativas de Janssen y Gilead y ha realizado labores de asesoramiento para Abbvie, Gilead y MSD.



- Álvaro Mena ha sido beneficiario de ayudas para proyectos de investigación de Gilead, ha recibido honorarios por ponencias de Abbvie, Gilead, Janssen, MSD y ViiV, ha percibido ayudas para asistencia a actividades formativas de Abbvie, Gilead, Janssen, MSD y ViiV y ha realizado labores de asesoramiento para Janssen.
- Luis Morano ha recibido honorarios por ponencias de Abbvie, Janssen, Gilead y MSD, ha percibido ayudas para asistencia a actividades formativas de Janssen y Gilead y ha realizado labores de asesoramiento para Abbvie, Janssen, Gilead y MSD.
- Nicolás Merchante ha recibido honorarios por ponencias de Gilead y MSD, ha percibido ayudas para asistencia a actividades formativas de Janssen Cilag, MSD, Gilead Sciences y ViiV Healthcare y ha realizado labores de asesoramiento para Gilead.
- Enriqueta Ochoa ha sido beneficiaria de proyectos de investigación de Lundbeck, ha recibido honorarios por ponencias por Indivior, Lundbeck y Otsuka y ha recibido ayuda para asistencia a actividades formativas de Janssen-Cilag, Reckitt-Benckiser/Indivior, Lundbeck, Otsuka, Servier, Shire, Lilly y Gilead.
- Juan A. Pineda ha sido beneficiario de ayudas para proyectos de investigación de Abbvie, Janssen, Gilead, MSD y ViiV, ha recibido honorarios por ponencias de Abbvie, Janssen, Gilead, MSD y ViiV, ha



percibido ayudas para asistencia a actividades formativas de Janssen y Gilead y ha realizado labores de asesoramiento para Abbvie, Janssen. Gilead y MSD.

- Carlos Roncero ha sido beneficiario de ayudas para proyectos de investigación de Gilead e Indivior, ha recibido honorarios por ponencias de Janssen-Cilag, Ferrer-Brainfarma, Pfizer, Indivior, Lundbeck, Otsuka, Servier, GSK, Rovi, Astra, Gilead, Sanofi, Exceltis y MSD y ha realizado labores de asesoramiento para Janssen-Cilag, Lundbeck, Gilead, MSD, Mundipharma, Indivior, Exceltis y Martindale.
- Juan Jesús Ruiz ha recibido honorarios por ponencias de Janssen-Cilag, Reckitt-Benckiser/Indivior, Lundbeck, Pfizer, Gilead y MSD y ha percibido ayudas para asistencia a actividades formativas de Janssen-Cilag, Reckitt-Benckiser/Indivior, Lundbeck, Pfizer, Gilead, MSD y Servier.
- Francisco Téllez ha percibido ayudas para asistencia a actividades formativas de Gilead, Abbvie y Merck.

#### **4. AGRADECIMIENTOS**

El panel agradece los comentarios a estas guías, durante la fase de alegaciones, de los siguientes socios de GEHEP: Dr. Cándido Hernández, Dra. Elisa Martró y Dra. Natalia García.

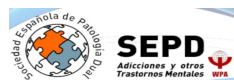

## 5. ABREVIATURAS

- AAD: Antivirales de acción directa.
- ARV: Antirretrovirales.
- BRCP: Proteína de resistencia del cáncer de mama.
- CAP: Centro de atención primaria.
- CTA: Centro de tratamiento de adicciones.
- EBR/GZR: Elbasvir/grazoprevir.
- GLE/PIB: Glecaprevir/pibrentasvir.
- gp-P: Glicoproteína P.
- HSH: Hombres que tienen sexo con hombres.
- LDV/SOF: Ledipasvir/sofosbuvir.
- MTA: Médico que trata adicciones.
- OMS: Organización Mundial de la Salud.
- PIJ: Programa de intercambio de jeringuillas.
- PR: Interferón pegilado + ribavirina.
- RBV: Ribavirina.
- RVS: Respuesta viral sostenida.
- RVS12: Respuesta viral sostenida a la semana 12.
- SOF: Sofosbuvir.
- SOF/VEL: Sofosbuvir/Velpatasvir.
- SOF/VEL/VOX: Sofosbuvir/Velpatasvir/Voxilaprevir.



- TDF: Tenofovir difosfato.
- TSO: Tratamiento sustitutivo de opiáceos.
- UD: Usuarios de drogas.
- UDVP: Usuarios de drogas por vía parenteral.
- UDVI: Usuario de drogas por vía inhalatoria.
- VAR: Variante asociada a resistencia.
- VHB: Virus de la hepatitis B.
- VHC: Virus de la hepatitis C.
- VHD: Virus de la hepatitis D.

## **6. INTRODUCCIÓN**

La eliminación de la infección por VHC es un objetivo que se ha marcado la OMS para ser alcanzado en 2030 (1). En España, los UD, en especial, los pacientes que son o han sido UDVP, constituyen el colectivo con las mayores tasas de prevalencia de infección por VHC. Por ello, el manejo correcto de la infección por VHC en dicho grupo poblacional es un paso imprescindible para lograr la eliminación de la infección por este agente en nuestro país.

Para cumplir el objetivo de la eliminación del VHC en UD se requieren tres medidas: por un lado, el tratamiento universal de todos los UD infectados por



VHC, para lo cual, a su vez, hay que garantizar el acceso al mismo y una adherencia correcta en su cumplimentación; en segundo lugar, es necesario hacer un cribado a gran escala de esta población, que identifique los sujetos en los que la infección no es conocida y, en tercer lugar, hay que implantar programas de reducción de riesgos que disminuyan la posibilidad de nuevas infecciones y reinfecciones. Mientras que la prescripción del tratamiento con AAD es un cometido a cargo del especialista hospitalario, el infectólogo en la mayoría de los casos en UD, o el hepatólogo, el MTA juega un papel fundamental en mejorar el acceso a ese tratamiento y en la adherencia al mismo. Igualmente, el cribado a gran escala es una labor que requiere de la participación del especialista hospitalario, principalmente el microbiólogo, pero en el que también es fundamental la colaboración del MTA. Finalmente, es cometido del MTA la implementación de programas de reducción de riesgos. Por todo ello, la colaboración entre infectólogos, microbiólogos y MTAs es fundamental para lograr la eliminación del VHC en UD. Estas fueron las razones que motivaron la elaboración de este documento, en donde se han consensuado las medidas necesarias para el correcto cribado, el envío a unidades hospitalarias, el tratamiento, seguimiento y prevención de la infección por VHC en UD, por parte de un panel de expertos de sociedades científicas implicadas en el abordaje de este problema.



## **7. METODOLOGÍA**

Las recomendaciones del panel de expertos se presentan en los seis apartados que siguen a éste. De la elaboración de cada capítulo se han encargado un redactor y un revisor. Todos los capítulos tuvieron una primera revisión por dos coordinadores y el documento fue discutido en su totalidad en reunión presencial del panel completo, encargándose un redactor general de escribir la versión final.

Para la graduación de la evidencia, se ha utilizado un sistema similar al empleado en otros documentos de consenso de SEIMC. De este modo, cada recomendación se califica con una letra que indica su fuerza: A (debe ofrecerse siempre), B (en general debe ofrecerse) o C (debe ofrecerse opcionalmente); y un número, que expresa las pruebas que sustentan dicha recomendación: I (resultados obtenidos a partir de uno o más ensayos clínicos, un metaanálisis o análisis integrado de ensayos clínicos), II (de uno o más estudios observacionales o de casos en serie) y III (en la opinión de expertos). En las recomendaciones de tratamiento de la infección por VHC, las opciones de más de 12 semanas o con RBV no se han considerado si existía una alternativa de menor duración o sin RBV.

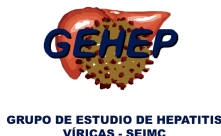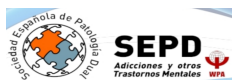

## **8. MEDIDAS GENERALES DE MANEJO DEL PACIENTE UD INFECTADO**

### **POR VHC**

#### **Dieta, régimen de vida y consumo de tóxicos**

Se recomienda una dieta variada, pobre en grasas saturadas, realizar ejercicio físico aeróbico y mantener peso normal. Un perfil metabólico desfavorable (síndrome metabólico, dislipemia, resistencia a la insulina/diabetes mellitus) favorece el acúmulo de grasa hepática y la progresión de la fibrosis. La infección crónica por VHC se ha asociado con el desarrollo de resistencia a la insulina y esteatosis hepática, especialmente el genotipo 3, muy prevalente entre los UD en España (1,2).

El consumo de café se ha asociado en algunos estudios a una disminución en la actividad necroinflamatoria y a una menor progresión de la fibrosis, aunque no existe suficiente evidencia para emitir una recomendación en este sentido.

Un consumo elevado de alcohol (>20gr/día en mujeres o >30gr/día en hombres) conlleva mayor progresión de la fibrosis, riesgo de cirrosis y descompensaciones (3-5). Se debe recomendar la abstinencia alcohólica. Los pacientes con trastorno por consumo de alcohol con infección por VHC, sean UD activos o no, deben ser remitidos a la red asistencial específica en drogodependencias de forma concomitante al inicio de tratamiento de la infección por VHC. En estos pacientes



la abstinencia es fundamental y es necesaria la coordinación entre el MTA y el especialista que va a tratar la infección por VHC para la monitorización estrecha y concomitante del paciente. El tabaco y el consumo diario de cannabis parecen incrementar la esteatogénesis y la progresión de la fibrosis por la estimulación de receptores cannabinoides hepáticos, aunque hay datos contradictorios (7-9).

Los pacientes infectados por VHC son más susceptibles para desarrollar cuadros de hepatotoxicidad por drogas y fármacos. No existen datos de toxicidad hepática por el uso de heroína o metadona (10). La buprenorfina puede provocar aumento de transaminasas. El consumo no pautado de otros opiáceos sintéticos (fentanilo y sus derivados no legales, oxicodona o hidromorfona, etc), combinados o no con heroína o metadona, puede producir, en un paciente con la función hepática deteriorada, una intoxicación aguda. La desomorfina o krokodil es un opiáceo sintético derivado de la codeína, de administración intravenosa, que ocasiona necrosis de tejidos blandos y daño multiorgánico. Los derivados de las feniletilaminas (MDMA, anfetaminas, catinonas, benzofuranos, aminoindonas, 2C-B, NBOMe y los derivados de todos ellos) y sustancias con acción simpaticomimética (cocaína, piperacinas, triptaminas...) pueden producir toxicidad hepática por mecanismo no conocido, pudiendo estar relacionado, entre otros, con la isquemia ocasionada por la vasoconstricción. Esta toxicidad incluye diferentes alteraciones en las pruebas de función hepática, incluyendo



hepatitis aguda tóxica. La ketamina puede producir toxicidad hepática de tipo colestásico y fibrosis hepática por mecanismo desconocido. Entre las nuevas drogas psicoactivas de origen vegetal, se ha descrito con el uso de kratom la aparición de colestasis intrahepática. El kava-kava es hepatotóxico por activación de los macrófagos hepáticos.

Los pacientes UD infectados por VHC no necesitan ajustes de dosis farmacológicas por su hepatopatía, salvo que haya deterioro importante de la función hepática (estadio Child-Pugh B o C). Es importante vigilar interacciones farmacológicas entre opiáceos de sustitución, antiretrovirales, antivíricos de otro tipo y psicofármacos.

### ***Recomendaciones***

- Se deben recomendar medidas higiénico-dietéticas para mejorar el perfil metabólico de los pacientes y disminuir la esteatosis (AI).
- Se recomienda a los UD infectados por VHC la abstinencia alcohólica (AII).
- Se recomienda a los UD infectados por VHC no consumir drogas ilegales psicoactivas (AIII).



## **Riesgo para convivientes y familiares**

No existe riesgo de transmisión del VHC al compartir utensilios habituales o por el contacto físico. Las personas infectadas no deben ser excluidas social ni laboralmente. Es recomendable no compartir objetos punzantes, cuchillas de afeitar o cepillos dentales, que pueden entrar en contacto con sangre de la persona infectada por VHC (11).

## **Recomendaciones**

- Es recomendable no compartir objetos potencialmente punzantes o cortantes, tales como cuchillas de afeitar o cepillos dentales (AII).

## **Vacunaciones frente a otros agentes**

La prevalencia de infección activa por VHB en UD se sitúa alrededor del 8% (12). La vacunación es eficaz y se recomienda el esquema rápido (pauta 0-1-2) para mejorar la adherencia (13), en enfermos que no presentan ningún marcador de exposición a VHB. Dado que no todos los pacientes responden, se les debe seguir para confirmar que aparecen títulos protectores de Anti-HBs y, en caso negativo, plantear estrategias de revacunación. La prevalencia de coinfección por VHD es superior en UD, sobre todo las sobreinfecciones, existiendo hasta cuádruples infecciones (VHB+VHC+VHD+VIH), aunque no existen medidas

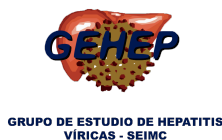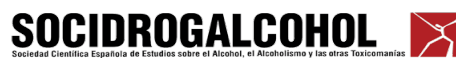

específicas para prevenir la infección por VHD, salvo la vacunación frente al VHB. Se recomienda vacunación frente al VHA en pacientes sin anti-VHA y una adecuada vacunación antitetánica.

### ***Recomendaciones***

- Los UD sin marcadores de exposición deben ser vacunados frente al VHA y VHB (AI).
- Tras la vacunación, los pacientes deben ser seguidos para confirmar que aparecen títulos protectores de Anti-HBs (AI).



## **9. CRIBADO DE LA INFECCIÓN POR VHC EN PACIENTES UD**

### **Diagnóstico de la infección por VHC**

Para el diagnóstico de la infección por VHC el primer paso es la detección de anticuerpos séricos frente al VHC. En los casos con serología positiva se deben determinar marcadores virológicos (ARN-VHC o antígeno del core del VHC).

### ***Técnicas Diagnósticas***

#### **Anticuerpos frente al VHC**

Su detección solo indica exposición previa al virus. Se realiza en plataformas de diagnóstico totalmente automatizadas que permiten el cribado de un gran volumen de muestras. Estas técnicas presentan una elevada sensibilidad y especificidad (14). Existen procedimientos rápidos, para uso en saliva y/o sangre capilar, que pueden ser de utilidad para grupos específicos de pacientes y que pueden contribuir a reducir etapas en el circuito diagnóstico (15).

#### **ARN-VHC (carga viral del VHC)**

Representa el genoma del virus y su presencia indica replicación viral. Los pacientes virémicos son los candidatos a tratamiento. Se utiliza también para evaluar la curación de la enfermedad tras el tratamiento, que se considera



alcanzada si la carga viral es menor de 15 UI/ml 12 semanas después de finalizar el tratamiento. La determinación de ARN-VHC está disponible en grandes plataformas automatizadas, que requieren agrupar un determinado número de muestras y en dispositivos de tipo “*point of care*”, que permiten determinaciones de una manera rápida en muestras aisladas (16).

### Antígeno del core del VHC

Forma parte de la estructura interna del VHC y su detección también indica replicación viral. Aunque es menos sensible que la carga viral, especialmente en pacientes con niveles bajos de ARN-VHC en plasma, diversos estudios han puesto de manifiesto su utilidad para la identificación de pacientes con infección activa por VHC (17,18). Su principal ventaja es la posibilidad de agilizar el diagnóstico en un solo paso sin necesidad de agrupar muestras y con menor coste que el ARN-VHC.

### Genotipado del VHC

El VHC se clasifica en 7 genotipos y numerosos subtipos (19). Junto al grado de fibrosis y la respuesta al tratamiento previo frente al VHC, el genotipado se ha venido utilizando para tomar decisiones sobre la terapia contra el VHC. Sin



embargo, con la llegada de nuevos regímenes de tratamiento pangenotípicos, se ha planteado el debate sobre si su determinación es todavía necesaria en la toma de decisiones para el tratamiento antiviral. Esto va a depender de varios factores, como la población que se va a tratar, las estrategias de tratamiento locales, y si se siguen utilizando pautas para las cuales conocer el genotipo es necesario. Conocer el genotipo infectante, además, resulta de utilidad para, en los pacientes que no se curan, diferenciar reinfecciones de verdaderas recidivas y puede añadir cierto valor pronóstico sobre la evolución de la lesión hepática (20).

### ***Infección activa e infección resuelta***

Para poder definir correctamente que pacientes son candidatos a tratamiento es imprescindible identificar al paciente que es virémico. Por lo tanto, es fundamental diferenciar infección activa, que se define como la fase de la infección por VHC en la que existe replicación viral, de infección resuelta. En la actualidad, en muchos centros hospitalarios sólo se realiza la detección de anticuerpos frente a VHC en el cribado de esta infección, lo que supone una ineficiencia importante en su manejo, al no identificar al paciente que debe acceder a atención hospitalaria y al sobrecargar las consultas de los especialistas con pacientes que han resuelto la infección espontáneamente y que, por tanto, no son candidatos al tratamiento. Además, esta estrategia supone



una importante pérdida en el número de pacientes que tienen infección activa. En este sentido, en un estudio realizado en Andalucía, se ha estimado que el 40% de los pacientes diagnosticados en el año 2016, utilizando solo la serología, no se derivaron a las consultas de Enfermedades Infecciosas ni de Hepatología (21).

### ***Diagnóstico en un solo paso***

El diagnóstico en un solo paso consiste en la investigación de viremia del VHC en todos los pacientes con anti-VHC positivo de nuevo diagnóstico (Figura 1, adaptado de 22). En un estudio piloto llevado a cabo en Granada y Santiago de Compostela, se comprobó que la instauración de esta estrategia, acompañada de alertas para la derivación de los pacientes, consiguió un aumento significativo del número de enfermos que se evaluaron y derivaron para tratamiento antiviral (23).

### **Estrategias de cribado**

Las evidencias que soportan que el cribado universal de la infección por VHC es coste-efectivo son limitadas (24,25), pero probablemente sea ésta la única vía para conseguir la eliminación del VHC (25). Entretanto, se deben considerar estrategias de cribado en grupos específicos con mayor riesgo, lo cual puede

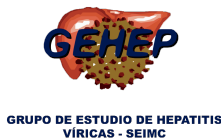

permitir la micro-eliminación de la infección por VHC en estos colectivos. En la actualidad se debe ofrecer prioritariamente el diagnóstico de infección por VHC a:

- Personas que son o han sido UDVP y UDVI.
- Grupos relacionados con la asistencia sanitaria (receptores de productos sanguíneos antes de 1990, pacientes sometidos a intervenciones invasivas, personal sanitario, etc.).
- Pacientes en hemodiálisis.
- Hijos de madres infectadas por el VHC.
- Personas con infección por el VIH o el VHB.
- Personas cuyas parejas sexuales están infectadas por el VHC.
- HSH (26).
- Personas con tatuajes, *piercings* o sometidas a procedimientos que utilizan instrumental punzantes (acupuntura, mesoterapia, tratamientos estéticos, de uñas, etc) en los que la esterilidad del material no pueda garantizarse (27).
- Personas que están o han estado internos en instituciones penitenciarias.

En poblaciones con una elevada prevalencia de infección activa se ha propuesto utilizar directamente la determinación de ARN-VHC, en lugar de la determinación



de anticuerpos, para el cribado de los pacientes. Con esta finalidad, se pueden utilizar sistemas de “*point-of-care*” o, si no están disponibles, se puede tomar la muestra en sistemas de sangre seca en papel de filtro, conocidos como DBS (*dried blood spot*), que facilitan el almacenamiento y la conservación de las muestras para su envío a los laboratorios hospitalarios (28).

### **Recomendaciones**

- Todos los UD debe ser cribados para la infección por VHC (AII).
- El cribado universal probablemente será necesario para la eliminación de la infección por VHC en éste, como en otros colectivos (AII).
- Se recomienda el diagnóstico en un solo paso para caracterizar la infección activa por VHC (AII).
- En los pacientes virémicos, si se dispone de muestra, se puede realizar directamente el genotipado del VHC (AII).



- En caso de estar disponible, se recomienda utilizar la determinación directa de ARN-VHC para el cribado de los pacientes ADVP en los CTA (AII).

**Figura 1.- Esquema del diagnóstico en un solo paso.**

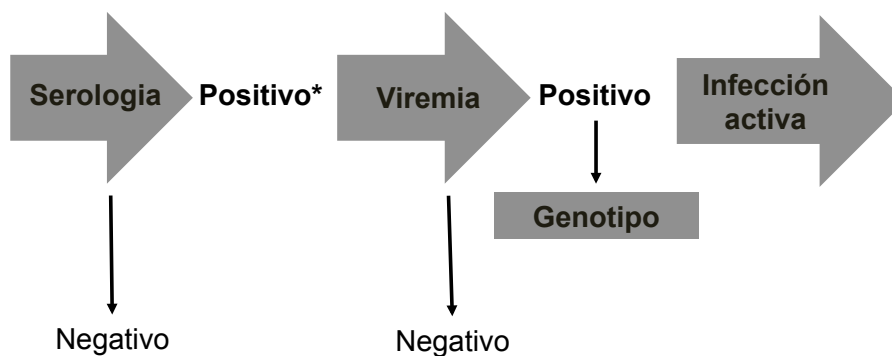

\* Verificar si nuevo diagnóstico o no tratamiento previo



## **10. INTERACCIÓN ENTRE HOSPITAL Y CENTROS DE ADICCIONES EN EL MANEJO DE LA INFECCIÓN POR VHC EN UD. VINCULACIÓN Y ADHERENCIA AL CUIDADO**

### **Optimización de la coordinación entre niveles asistenciales**

Pese a que los UD constituyen el colectivo con mayor prevalencia de infección crónica por el VHC, el número de UD diagnosticados y tratados es aún subóptimo (29). Se trata de un colectivo muy numeroso y heterogéneo de difícil acceso, que requiere un plan de abordaje integral específico. Por otro lado, el sistema sanitario español es también muy heterogéneo y adolece de una adecuada coordinación entre los distintos niveles asistenciales implicados en la atención de estos pacientes, cuya vinculación con el sistema sanitario es escasa o nula, y depende fundamentalmente de los MTA y/o de los médicos que trabajan en los CAP, quienes a su vez mantienen una escasa o nula coordinación entre sí y con los médicos de atención especializada, lo que dificulta aún más el control de la infección en estos pacientes. Por tanto, para afrontar con éxito el reto establecido por la OMS de eliminar la infección en 2030 (1), es imprescindible mejorar la coordinación entre niveles para ofrecer una atención multidisciplinar, que ha demostrado obtener mejores resultados (30) y establecer protocolos consensuados de actuación específicos para estos pacientes.



## **Recomendaciones**

- Es necesario designar médicos coordinadores para el abordaje la infección por VHC en los CTA y en los hospitales de referencia, con reuniones periódicas conjuntas, de presencia física, o mediante vídeo o teleconferencia, y establecer mecanismos directos de comunicación entre ellos para el intercambio ágil de información y la resolución rápida de problemas (AIII).
- Se debe disponer de una historia clínica electrónica y un sistema de registro de pacientes con acceso compartido por los CTA, los CAP y las consultas especializadas (AIII).

## **Identificación de los pacientes infectados**

Todos los UD deben ser cribados para la infección por VHC, preferiblemente en el CTA y en un solo paso, porque con ello se reduce significativamente la pérdida de pacientes tanto para su diagnóstico como para su seguimiento (31). El cribado de la infección por VHC y los procedimientos a usar han sido tratados en el apartado anterior de este documento.

## **Recomendaciones**

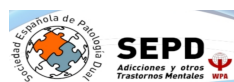

- El diagnóstico de la infección por VHC debe realizarse en el propio CTA, siempre que sea posible (AIII).

**Figura 2.- Cribado y derivación de los pacientes en los CTA**

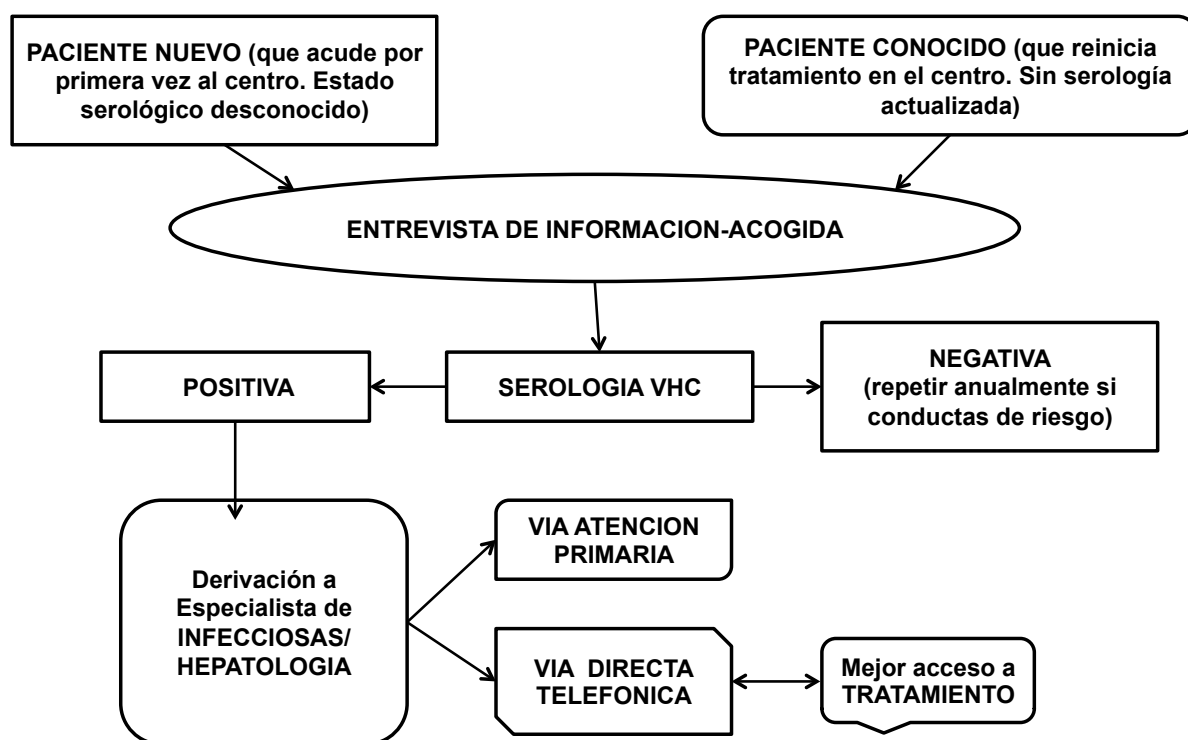

### **Evaluación y estadiaje de la enfermedad. Papel de la telemedicina**

Una vez diagnosticado de infección por VHC, el paciente deben ser derivado al especialista en Enfermedades Infecciosas o Hepatología para su estadiaje y



tratamiento. Para ello puede ser útil un gestor de casos en el CTA, pues la coordinación de los cuidados, junto con intervenciones conductuales-motivacionales, aumentan la probabilidad de que el paciente acceda a ser evaluado y tratado (32,33). También se han mostrado útiles los programas de intervención educativa, que informan sobre las potenciales complicaciones de la infección y la disponibilidad de tratamientos eficaces y seguros para evitar las mismas (34) así como la ayuda de pacientes previamente tratados (pares), que actuando como acompañantes voluntarios, facilitan el acceso al especialista y proporcionan soporte psicológico, reduciendo de este modo el aislamiento y contribuyendo a mejorar la vinculación al sistema sanitario y la adherencia al tratamiento (35). Para los pacientes con importantes barreras en el acceso al especialista, la telemedicina (consultas por videoconferencia) ha demostrado su utilidad para mejorar su vinculación al sistema sanitario, con un incremento importante en el número de pacientes tratados y con tasas de RVS superponibles a las de pacientes atendidos directamente (36), permitiendo incluso el manejo integral del paciente infectado en el CAP con el apoyo virtual del médico especialista (37). En España disponemos de la red pública SARA (Sistema de Aplicaciones y Redes para las Administraciones) que permite la conexión gratuita y segura dentro de las administraciones públicas. La información detallada sobre sus características y prestaciones está accesible en [www.redsara.es](http://www.redsara.es)



## **Recomendaciones**

- Debe existir un programa de coordinación asistencial para el manejo del paciente UD infectado por VHC (AII).
- El acompañamiento por pares debe ofrecerse cuando esté disponible (AII).
- Debe fomentarse el uso de la telemedicina, tanto para la relación entre profesionales, como para el seguimiento de pacientes con dificultades de acceso al especialista (BII).

## **Seguimiento del tratamiento en el CTA. Valoración de efectos adversos e interacciones y control de adherencia**

El tratamiento de la infección por VHC con AAD debe ser monitorizado tanto por el especialista como por el MTA, quien debe ser informado por el médico especialista del plan de tratamiento y seguimiento previsto y participar activamente en la detección y el manejo de los efectos adversos e interacciones más comunes, así como fomentar la adherencia terapéutica. El asesoramiento del MTA a través del contacto telefónico, correo electrónico y/o telemedicina han



mostrado su utilidad para reducir la necesidad de derivación de pacientes y los costes (37).

En pacientes con historia previa de escasa adherencia se debe facilitar por los estamentos implicados la administración del tratamiento directamente observado por el personal sanitario del CTA, pues la localización común del manejo del VHC y la adicción es una estrategia que ha mostrado mejores resultados que el manejo separado de estos problemas (38).

### ***Recomendaciones***

- En pacientes con probable escasa adherencia se debería realizar un tratamiento directamente observado dentro del recurso asistencial que permita llevarlo a cabo (AIII).

## **11. TRATAMIENTO FARMACOLÓGICO DE LA HEPATITIS C EN EL PACIENTE UD**

### **Beneficios e indicaciones del tratamiento de la hepatitis C**

El objetivo del tratamiento de la infección por VHC es la consecución de la RVS, definida por la ausencia de ARN-VHC detectable 12 semanas después de la finalización del tratamiento, lo que equivale a la curación de la infección.



Conseguir RVS proporciona numerosos beneficios hepáticos: reducción en la inflamación y fibrosis hepática, mejoría de la hipertensión portal en pacientes con cirrosis, menor riesgo de carcinoma hepatocelular y una reducción de la mortalidad de causa hepática y de la necesidad de trasplante (39,40). A nivel extrahepático, la RVS mejora el pronóstico de la crioglobulinemia mixta esencial y de los trastornos linfoproliferativos asociados al VHC. Todos estos beneficios se traducen en una mejora de la calidad de vida y en una reducción de la mortalidad global (39,41).

Además, las personas que logran RVS dejan de tener la capacidad de transmitir el VHC, sumando a los beneficios individuales de la RVS otros en términos de salud pública. Así, aumentar la proporción de pacientes con RVS entre UD es una estrategia útil para disminuir la prevalencia e incidencia de la hepatitis C (42). Por tanto, el tratamiento del VHC en aquellos pacientes con alto riesgo de transmisión, como los UD, representa una herramienta única para reducir la incidencia de nuevas infecciones y reinfecciones entre aquellos con prácticas activas de riesgo.

El uso de drogas ha sido clásicamente una barrera para el acceso al tratamiento, fundamentalmente por el temor a una posible peor adherencia, un mayor riesgo de reinfección y una menor eficacia del tratamiento. Sin embargo, no existen



datos que justifiquen la no indicación del tratamiento en base al consumo de alcohol o drogas. Así, un metaanálisis ha demostrado que las tasas de adherencia y eficacia de los tratamientos basados en interferón en UD son comparables a las de los no UD (43). Datos en vida real de la cohorte GEHEP han demostrado que los AAD son altamente eficaces en los pacientes UD, incluyendo aquellos que están en TSO (44).

### **Recomendaciones**

- El tratamiento con AAD se considera indicado en todos los pacientes UD con infección por el VHC (AI).

### **Pautas de tratamiento recomendadas**

#### ***Pacientes sin exposición previa a AAD***

La tabla 1 resume las pautas recomendadas. A continuación, se describe brevemente la evidencia que soporta dichas recomendaciones.

#### Genotipo 1

##### *Elbasvir/grazoprevir*

El ensayo clínico C-EDGE TN evaluó la eficacia y seguridad de la combinación a dosis fija de EBR/GRZ 50/100 mg durante 12 semanas en 421 pacientes genotipo 1, 4 o 6 (45). La tasa de RVS12 fue del 92% (144/157) para genotipo 1a



y del 99% (129/131) para 1b. En los 92 pacientes cirróticos incluidos, la cifra de RVS12 fue del 97%. La presencia de VARs en NS5A en genotipo 1a se asoció con una menor probabilidad de RVS (58% (11/19) vs 99% (133/135) en aquellos sin VARs). El ensayo clínico C-EDGE CO-STAR (46) evaluó la pauta EBR/GRZ en 301 pacientes con TSO, la mayoría manteniendo además un consumo activo de drogas. Excluidas seis reinfecciones, la tasa de RVS12 global fue del 94%.

#### *Glecaprevir/pibrentasvir*

El estudio ENDURANCE-1 (47) evaluó la combinación a dosis fija GLE/PIB 300/120 mg en 703 pacientes no cirróticos con genotipo 1 tratados durante ocho o 12 semanas. La tasa de RVS12 fue del 99.1% (348/351) para ocho semanas y 99.7% (351/352) para 12 semanas. La tasa de RVS12 a GLE/PIB 12 semanas en 146 pacientes genotipo 1-6 con cirrosis fue del 99% en el ensayo EXPEDITION-1 (48). El 98% de los pacientes coinfectados por VIH/VHC logró RVS12 en el EXPEDITION-2 (49). La presencia de VARs o el subtipo no impactaron en la RVS12 en los ensayos EXPEDITION 1 y 2. Hasta el momento, no existe un ensayo clínico específico de GLE/PIB en UD.

#### *Ledipasvir/sofosbuvir*

La combinación a dosis fija LDV/SOF 90/400 mg se evaluó en los ensayos ION-1 (50) e ION-3 (51). Los pacientes no cirróticos con carga viral baja pueden



tratarse ocho semanas (51,52), salvo aquellos coinfectados por el VIH, donde el riesgo de recidiva es mayor (53).

### *Sofosbuvir/velpatasvir*

El 98% de los pacientes con genotipo 1a y el 99% con 1b consiguieron RVS12 con la combinación a dosis fija de SOF/VEL 400/100 mg durante 12 semanas en el ensayo ASTRAL-1 (54). En pacientes (todos los genotipos) con cirrosis, la alcanzaron 120/121 (99%). El estudio en fase 3 POLARIS-2 (55) comparó la RVS12 en 941 pacientes infectados por genotipo 1-6 randomizados a recibir ocho semanas de SOF/VEL/VOX 400/100/100 mg frente a 12 semanas de SOF/VEL. La tasa de RVS12 en el brazo de SOF/VEL fue del 99% para genotipo 1a (170/172) y del 97% (57/59) para 1b. El estudio SIMPLIFY (56) evaluó la eficacia de SOF/VEL en 103 pacientes que habían sido UDVP en los 6 meses anteriores y 100/103 (97%) pacientes lograron RVS12.

### Genotipo 2

#### *Glecaprevir/pibrentasvir*

La tasa de RVS con GLE/PIB 12 semanas en 302 pacientes genotipo 2, incluidos en el estudio ENDURANCE-2, fue del 99% (57). En el ensayo en fase 2 SURVEYOR-II (57), 135/137 (99%) pacientes genotipo 2 sin cirrosis tratados



ocho semanas lograron RVS12. En el EXPEDITION-1 (48) se incluyeron 31 pacientes genotipo 2 con cirrosis, presentando el 100% RVS12.

### *Sofosbuvir/velpatasvir*

En el ensayo ASTRAL-2 se comparó la eficacia de SOF/VEL 12 semanas frente a SOF+RBV 12 semanas en 266 pacientes genotipo 2 (58). La cifra de RVS12 fue superior en el brazo de SOF/VEL (99% vs 94%). Además, el 100% de 53 pacientes con genotipo 2 incluidos en el brazo de SOF/VEL del estudio en fase 3 POLARIS-2 lograron RVS12 (55). El análisis integrado de los datos en genotipo 2 de los estudios ASTRAL-1 y ASTRAL-2 (54,58) mostró unas tasas de eficacia del 100% en cirróticos (29/29) y del 99% en población *naïve* (194/195).

### Genotipo 3

#### *Glecaprevir/pibrentasvir*

La tasa de RVS12 a GLE/PIB en los pacientes genotipo 3 del estudio ENDURANCE-3 (47) fue del 95% (223/233 tratados 12 semanas y 149/157 de los tratados ocho semanas). En este ensayo, 19/20 (95%) pacientes con fibrosis F3 tratados durante 12 semanas lograron RVS12, frente a 24 de 27 (89%) de los tratados 8 semanas. Por otro lado, la presencia de VARs basales en NS3 o en NS5A se asoció con tasas de RVS12 subóptimas (86% y 91% respectivamente) en el brazo de 8 semanas. En el ensayo SURVEYOR-II (59), 48/48 (100%)



pacientes *naïve* genotipo 3 con cirrosis compensada lograron RVS12 tras 12 semanas de GLE/PIB.

### *Sofosbuvir/velpatasvir*

El estudio ASTRAL-3 evaluó la pauta SOF/VEL 12 semanas en pacientes con genotipo 3 (58). La tasa de RVS12 fue del 98% (160/163) en los no cirróticos y del 93% (40/43) en los cirróticos. En el brazo SOF/VEL 43/250 (16%) tenían VARs en NS5A, de los cuales el 88% lograron RVS12, frente al 97% de aquellos sin VARs. El 84% (21/25) de aquellos con la Y93H lograron RVS12. En el ensayo POLARIS-2, 89 pacientes con genotipo 3 sin cirrosis recibieron SOF/VEL 12 semanas y el 97% logró RVS12 (55).

### Genotipo 4

#### *Glecaprevir/pibrentasvir*

Setenta y cinco de 76 (99%) pacientes portadores de genotipo 4, no cirróticos, tratados con GLE/PIB 12 semanas lograron RVS12 en el estudio ENDURANCE-4 (57). En el ensayo SURVEYOR-II, 43/46 (93%) pacientes alcanzaron RVS12 tras ocho semanas de GLE/PIB (57). El ensayo EXPEDITION-1 incluyó 16 pacientes genotipo 4 con cirrosis compensada, tratados 12 semanas con GLE/PIB, y todos lograron RVS12 (48).



### *Sofosbuvir/velpatasvir*

Los 64 pacientes *naïve* con genotipo 4 incluidos en el estudio ASTRAL-1 lograron RVS12 (54). El ensayo POLARIS-2 (55) incluyó 57 pacientes con genotipo 4 tratados con SOF/VEL; el 98% alcanzó RVS12.

### *Elbasvir/grazoprevir*

Sesenta y cuatro de 66 (97%) pacientes tratados con EBR/GZV 12 semanas en un ensayo en fase 2/3 lograron RVS12 (60). Sin embargo, en un análisis integrado de ensayos clínicos con este fármaco, sólo 39/44 (89%) pacientes pretratados con PR lograron RVS (61).

### Genotipos 5 y 6

#### *Glecaprevir/pibrentasvir*

La tasa de RVS12 tras GLE/PIB 12 semanas fue del 100% para los pacientes con genotipo 5 (26/26) y 6 (19/19) en el estudio ENDURANCE-4 (57). En el ensayo SURVEYOR-II (57), dos de dos y nueve de diez pacientes con genotipo 5 y 6, respectivamente, tratados ocho semanas lograron RVS. Los dos y siete pacientes con cirrosis compensada con genotipo 5 y 6, respectivamente, tratados 12 semanas en el estudio EXPEDITION-1 lograron RVS (48).

### *Sofosbuvir/velpatasvir*



Veintitrés de 24 (96%) pacientes con genotipo 5 y 38/38 (100%) con genotipo 6 tratados 12 semanas con SOF/VEL en el ensayo ASTRAL-1 (54) mostraron RVS12. Los nueve pacientes con genotipo 6 en la rama de SOF/VEL del POLARIS-2 (55) también consiguieron RVS.

### ***Pacientes con fracaso previo a AAD o con cirrosis descompensada***

El escenario del paciente con fracaso previo a AAD o con cirrosis descompensada plantean retos de manejo que exceden el objeto de esta guía y, por ello, se remite al lector a las recomendaciones generales de GEHEP sobre el tratamiento de la infección por VHC. En pacientes con fracaso previo a AAD se realizará siempre que sea posible un estudio de resistencia, y la terapia de rescate se elegirá de acuerdo con sus resultados. Este estudio puede ayudar a diferenciar recidiva de reinfección.

### ***Recomendaciones***

Las pautas de tratamiento de la infección por VHC recomendadas en pacientes sin exposición previa a AAD, en los pretratados en los que no se dispone de estudio de resistencias y en los que presentan cirrosis descompensada se resumen en las tablas 1, 2 y 3, respectivamente.



- Los enfermos pretratados, así como aquellos con cirrosis descompensada, deben ser valorados en unidades con amplia experiencia en el manejo de este tipo de pacientes (AIII).
- Para los pacientes pretratados con AAD se recomienda siempre el rescate guiado por un estudio de resistencias (AII).

### **Manejo de los efectos secundarios de los AAD**

La tolerabilidad de los AAD es extraordinariamente buena, pues presentan sólo efectos secundarios leves o moderados, que no requieren de ningún abordaje específico más allá de algunos tratamientos sintomáticos, y que no suelen motivar el abandono del tratamiento. Lo único que hay que tener siempre presente son las posibles interacciones de los fármacos concomitantes que vayamos a añadir.



**Tabla 1.- Pautas recomendadas de tratamiento en pacientes sin exposición previa a AAD, no cirróticos o con cirrosis compensada.**

|                                                  | <b>Duración<br/>(semanas)</b>                   | <b>Nivel de<br/>evidencia</b> |
|--------------------------------------------------|-------------------------------------------------|-------------------------------|
| <b>Genotipo 1a<sup>1</sup></b>                   |                                                 |                               |
| Elbasvir 50 mg/grazoprevir 100 mg <sup>2,3</sup> | 12                                              | AI                            |
| Sofosbuvir 400 mg/velpatasvir 100 mg             | 12                                              | AI                            |
| Glecaprevir 300 mg/pibrentasvir 120 mg           | 8 si no cirrosis<br>12 si cirrosis <sup>3</sup> | AI<br>AI                      |
| Ledipasvir 90 mg/sofosbuvir 400 mg <sup>4</sup>  | 8                                               | BII                           |
| <b>Genotipo 1b<sup>1</sup></b>                   |                                                 |                               |
| Elbasvir 50 mg/grazoprevir 100 mg <sup>3</sup>   | 12                                              | AI                            |
| Sofosbuvir 400 mg/velpatasvir 100 mg             | 12                                              | AI                            |
| Glecaprevir 300 mg/pibrentasvir 120 mg           | 8 si no cirrosis<br>12 si cirrosis <sup>3</sup> | AI<br>AI                      |
| Ledipasvir 90 mg/sofosbuvir 400 mg <sup>2</sup>  | 8                                               | BII                           |
| <b>Genotipo 2</b>                                |                                                 |                               |
| Sofosbuvir 400 mg/velpatasvir 100 mg             | 12                                              | AI                            |
| Glecaprevir 300 mg/pibrentasvir 120 mg           | 8 si no cirrosis                                | AI                            |



|                                                    |                             |     |
|----------------------------------------------------|-----------------------------|-----|
|                                                    | 12 si cirrosis <sup>3</sup> | All |
| <b>Genotipo 3</b>                                  |                             |     |
| Sofosbuvir 400 mg/velpatasvir 100 mg <sup>5</sup>  | 12                          | AI  |
| Glecaprevir 300 mg/pibrentasvir 120mg <sup>6</sup> | 12 <sup>7</sup>             | All |
| <b>Genotipo 4</b>                                  |                             |     |
| Elbasvir 50 mg/grazoprevir 100 mg <sup>3,8</sup>   | 12                          | AI  |
| Sofosbuvir 400 mg/velpatasvir 100 mg               | 12                          | AI  |
| Glecaprevir 300 mg/pibrentasvir 120 mg             | 12 <sup>9</sup>             | All |
| <b>Genotipo 5 y 6</b>                              |                             |     |
| Sofosbuvir 400 mg/velpatasvir 100 mg               | 12                          | AI  |
| Glecaprevir 300 mg/pibrentasvir 120 mg             | 8 si no cirrosis            | All |
|                                                    | 12 si cirrosis <sup>3</sup> | All |

<sup>1</sup>Los pacientes con infección por genotipo 1 no subtipable deben ser tratados como el genotipo 1a.

<sup>2</sup>Si el ARN VHC < 800.000 UI/mL, o en pacientes con ARN VHC ≥ 800.000 UI/mL si hay constancia de la no existencia de VARs a EBR.

<sup>3</sup>Sólo en pacientes con cirrosis compensada en estadio A de Child-Pugh.



<sup>4</sup>Sólo aplicable a pacientes sin cirrosis, de raza no negra, sin infección VIH, con ARN VHC < 6.000.000 UI/ml y sin experiencia previa con PR.

<sup>5</sup>En pacientes con cirrosis se recomienda añadir RBV si existen VARs en NS5A o si no se dispone de esta información.

<sup>6</sup>Si experiencia previa con PR la duración será de 16 semanas.

<sup>7</sup>En pacientes con fibrosis F0-F2 y ausencia de VARs en NS3 y NS5A, la duración podrá ser de 8 semanas.

<sup>8</sup>En pacientes pretratados con PR se aconseja usar otra pauta de las recomendadas.

<sup>9</sup>La pauta de ocho semanas produce tasas de RVS del 93%, frente al 99% la de 12 semanas (62), por lo que se recomiendan 12 semanas, independientemente de la existencia o no de cirrosis.



**Tabla 2.- Pautas de tratamiento recomendadas en pacientes con exposición previa a AAD, si no se dispone de estudio de resistencias.**

|                                                    | Duración<br>(semanas) | Nivel de<br>evidencia |
|----------------------------------------------------|-----------------------|-----------------------|
| <b>Genotipo 1</b>                                  |                       |                       |
| No cirrosis                                        |                       |                       |
| Sofosbuvir/velpatasvir/voxilaprevir <sup>1</sup>   | 12                    | AI                    |
| Glecaprevir/pibrentasvir <sup>2</sup>              | 12                    | BII                   |
| Sofosbuvir/velpatasvir <sup>3</sup>                | 12                    | BII                   |
| Cirrosis compensada                                |                       |                       |
| Sofosbuvir/velpatasvir/voxilaprevir <sup>1,4</sup> | 12                    | AI                    |
| <b>Genotipo 2</b>                                  |                       |                       |
| No cirrosis                                        |                       |                       |
| Sofosbuvir/velpatasvir/voxilaprevir                | 12                    | AII                   |
| Sofosbuvir/velpatasvir <sup>5</sup>                | 12                    | AII                   |
| Glecaprevir/pibrentasvir <sup>5</sup>              | 12                    | AIII                  |
| Cirrosis compensada                                |                       |                       |
| Sofosbuvir/velpatasvir/voxilaprevir <sup>4</sup>   | 12                    | AII                   |
| Sofosbuvir/velpatasvir <sup>5</sup>                | 12                    | AII                   |



|                                                  |    |      |
|--------------------------------------------------|----|------|
| Glecaprevir/pibrentasvir <sup>4,5</sup>          | 12 | AIII |
| <b>Genotipo 3</b>                                |    |      |
| No cirrosis                                      |    |      |
| Sofosbuvir/velpatasvir/voxilaprevir              | 12 | AI   |
| Cirrosis compensada                              |    |      |
| Sofosbuvir/velpatasvir/voxilaprevir <sup>4</sup> | 12 | AI   |
| <b>Genotipo 4, 5 y 6</b>                         |    |      |
| No cirrosis                                      |    |      |
| Sofosbuvir/velpatasvir/voxilaprevir              | 12 | AII  |
| Cirrosis compensada                              |    |      |
| Sofosbuvir/velpatasvir/voxilaprevir <sup>4</sup> | 12 | AII  |

<sup>1</sup>Pauta universal de elección independientemente del esquema de AAD previo, especialmente ante fallos a NS5A.

<sup>2</sup>Sólo si fallo previo a PR + NS3 o SOF +/- NS3, tanto en GT 1a como 1b.

<sup>3</sup>Sólo si fallo previo a PR + NS3 (GT 1a y 1b) o SOF +/- NS3 (sólo GT1b).

<sup>4</sup>Sólo para pacientes en estadio Child-Pugh A.

<sup>5</sup>Sólo si fallo a un régimen que no incluía un inhibidor de NS5A.



**Tabla 3.- Pautas recomendadas de tratamiento en el paciente con cirrosis descompensada.**

|                                                                   | <b>Duración<br/>(semanas)</b> | <b>Nivel de<br/>evidencia</b> |
|-------------------------------------------------------------------|-------------------------------|-------------------------------|
| <b>Genotipos 1, 2, 3 y 4</b>                                      |                               |                               |
| Sofosbuvir 400 mg/velpatasvir 100 mg +<br>ribavirina <sup>1</sup> | 12 <sup>2</sup>               | AI                            |
| <b>Genotipo 5 y 6</b>                                             |                               |                               |
| Sofosbuvir 400 mg/velpatasvir 100 mg +<br>ribavirina <sup>1</sup> | 12 <sup>2</sup>               | AI                            |

<sup>1</sup>Usar dosis ajustada a peso: 1000 mg si < 75 Kg, 1200 mg si ≥ 75 Kg, excepto en pacientes en estadio C de Child-Pugh, en los que se comenzará con una dosis más baja (600 mg/día) y se aumentará según tolerancia.

<sup>2</sup>En pacientes en los que no pueda asociarse RBV, prolongar el tratamiento durante 24 semanas (AI).

En aquellos pacientes (todos los genotipos) con fracaso previo a regímenes basados en SOF o NS5A, prolongar el tratamiento (SOF/VEL + RBV) durante 24 semanas (CIII).



## **12. INTERACCIONES FARMACOLÓGICAS ENTRE LOS AAD Y**

### **FÁRMACOS DE USO COMÚN EN UD. INTERACCIONES DE LOS AAD**

### **CON DROGAS DE USO ILEGAL**

Los pacientes infectados por VHC suelen estar polimedicados, porque frecuentemente reciben otros fármacos para el tratamiento de coinfecciones (63-70), de otras enfermedades orgánicas o de trastornos mentales, incluyendo las adicciones (66). Además, el subgrupo con trastornos por uso de sustancias frecuentemente es consumidor tanto de drogas legales (tabaco, alcohol...), como ilegales (cocaína, heroína), por lo que también puede haber interacciones farmacológicas con estas últimas. Por otra parte, se debe considerar que en estos pacientes pueden darse circunstancias que favorecen las interacciones, como la edad, la insuficiencia hepática (65), o la existencia de insuficiencia renal crónica (64).

### **Mecanismos más comunes de interacciones**

La presentación de interacciones medicamentosas es relativamente frecuente en la práctica clínica. Sin embargo, en ocasiones, son difíciles de detectar ya que pueden pasar desapercibidas o ser confundidas con un efecto secundario de alguno de los medicamentos utilizados, o tomadas como un síntoma más de la enfermedad (71).



Las interacciones consisten en la modificación de la actividad terapéutica de un fármaco o de su toxicidad cuando es administrado junto otros fármacos, drogas o alimentos. El resultado de esta interacción puede ser “beneficiosa”, si aumenta la actividad terapéutica o disminuye la toxicidad de algún fármaco. Sin embargo, lo más frecuente es que sea “perjudicial” y que disminuya el efecto terapéutico, lo que puede llevar al fracaso del tratamiento, o aumente su toxicidad (71).

Las interacciones mas importantes pueden producirse por: 1) interferencias a nivel del citocromo P450, por ejemplo los inhibidores de la proteasa del VIH y los del VHC; 2) Interferencia a nivel de transportadores; 3) por modificaciones del pH gástrico, p.ej omeprazol con LDV o VEL; 4) por mecanismos desconocidos (amiodarona/SOF); 5) por varios a la vez (65-73). Así, LDV, SOF, GLE, PIB y VEL son sustratos del transportador de fármacos gp-P y de la BCRP. Los fármacos inductores potentes de la gp-P, por ejemplo rifampicina, carbamacepina o fenitoína, producen disminución de las concentraciones de los AAD, por lo que están contraindicados. GZR es sustrato del transportador de fármacos AOTP1B, al igual que GLE, VEL y VOX, y, con EBR, también del CYP3A y de la gp-P, por lo que la coadministración de inductores potentes de estas enzimas con ellos están contraindicados (65-73). La Universidad de



Liverpool en su web [www.hep-druginteractions.org](http://www.hep-druginteractions.org) hace una detallada y actualizada exposición de las interacciones y su mecanismo (72).

Las interacciones de los diferentes AAD usados actualmente ha sido objeto de varios ensayos clínicos (65). La consecuencia más frecuente de las interacciones es la necesidad de ajuste de dosis o de una mayor monitorización, lo que puede suceder en el 20-25% de los casos, aunque puede llegar a implicar la contraindicación del fármaco (menos del 3% de los casos) (65). El 30% de los pacientes con hepatopatía leve y el 44% de los portadores de una enfermedad hepática moderada-grave que reciben AAD usan al menos un fármaco con potenciales interacciones con ellos (65).

### **Interacciones de AAD con los psicofármacos y drogas de abuso**

En lo concerniente a las interacciones entre los psicofármacos y las drogas de abuso con los AAD, hay que prestar especial atención al posible efecto sedante, y a la aparición de alteraciones del sueño o irritabilidad. Se han reportado casos de interacciones de los AAD con varios de los psicofármacos de uso común, aunque son poco frecuentes (Tabla 4). Otras sustancias utilizadas popularmente buscando un efecto ansiolítico-antidepresivo como la hierba de San Juan (*hypericum*), deben ser evitadas en estos pacientes (72). El alcohol y algunas drogas ilegales son causas de interacción medicamentosa (71). Sin embargo



existen pocos datos en la literatura sobre interacciones de los AAD con las drogas. Afortunadamente, con los AAD de uso actual parece que las interacciones con las drogas ilegales habitualmente utilizadas son infrecuentes (Tabla 5).

### **Interacciones de los AAD y otros fármacos de uso común**

Los pacientes infectados por VHC reciben frecuentemente fármacos que actúan sobre el aparato gastrointestinal, cardiovascular o analgésicos (65-73). En lo referente a los usados para enfermedades digestivas, se han descrito interacciones de distinta magnitud entre los inhibidores de la bomba de protones y diversos AAD (65-73). Entre los antiarrítmicos, se deben destacar las interacciones de SOF con amiodarona (Tabla 6). Por otra parte, algunos pacientes infectados por VHC reciben tratamiento para la coinfección por VIH, siendo especialmente relevantes las interacciones con ARV (63). Las interacciones entre los AAD y los ARV están relacionadas con el metabolismo del CYP450, ya que se producen fenómenos de inducción/inhibición, especialmente en el caso de los inhibidores de la proteasa y la mayoría de los inhibidores no-nucleósidos de las polimerasas de ambos virus. Sin embargo, los fármacos inhibidores de la polimerasa análogos de nucleótidos del VHC, los inhibidores de la NS5A y los inhibidores de la integrasa para el VIH tienen menos o ningún efecto sobre el CYP450, por lo que son origen de menos interacciones. En



pacientes coinfectados por VIH y VHC o VHB y VHC, hay que tener en cuenta que las combinaciones LED/SOF y SOF/VEL aumentan las concentraciones de TDF, por lo que podrían incrementar la nefrotoxicidad de este último (64).

### ***Recomendaciones***

- Las interacciones entre los AAD y el resto de los fármacos deben ser evaluadas sistemáticamente para decidir y priorizar el uso de AAD (AI).
- El farmacéutico hospitalario debe participar en la prevención y vigilancia de las interacciones de los AAD (AII).
- Las interacciones deben considerarse especialmente en los pacientes con enfermedad hepática grave, en los de edad más avanzada y en los polimedicados (AI).

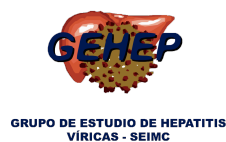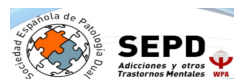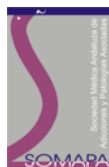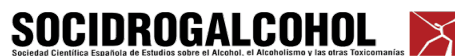

**Tabla 4: Interacciones entre AAD y psicofármacos\* (excepto antiepilépticos/eutimizantes)**

|                                                                                                                                                                                                                                               | EBR/GZR | GLE/PIB | SOF/LDV | SOF/VEL | SOF/VEL/VOX |
|-----------------------------------------------------------------------------------------------------------------------------------------------------------------------------------------------------------------------------------------------|---------|---------|---------|---------|-------------|
| Alprazolam, Atomoxetina, Bromacepam, Bupropión,<br>Clorpromacina, Clonidina, Desimipramina, Haloperidol,<br>Litio, Levomepromazina, Metadona, Mirtazapina,<br>Morfina, Naloxona, Naltrexona, Olanzapina,<br>Trazodona, Venlaxina, Ziprasidona | 4       | 4       | 4       | 4       | 4           |
| Aripiprazol                                                                                                                                                                                                                                   | 2       | 2       | 4       | 4       | 4           |
| Buprenorfina                                                                                                                                                                                                                                  | 4       | 4       | 2       | 4       | 3           |
| Clotiapina                                                                                                                                                                                                                                    | 3       | 3       | 2       | 4       | 4           |
| Clozapina                                                                                                                                                                                                                                     | 4       | 2       | 4       | 4       | 4           |
| Midazolam                                                                                                                                                                                                                                     | 2       | 4       | 4       | 4       | 4           |

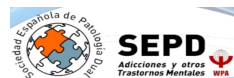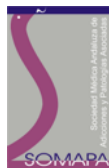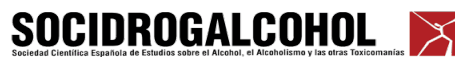

|              |   |   |   |   |   |
|--------------|---|---|---|---|---|
| Modafinilo   | 1 | 2 | 2 | 4 | 4 |
| Paliperidona | 4 | 2 | 2 | 4 | 2 |
| Pimocide     | 2 | 1 | 1 | 4 | 4 |
| Quetiapina   | 2 | 2 | 4 | 4 | 4 |
| Tioridazina  | 4 | 2 | 4 | 4 | 4 |

1: no recomendado 2: potenciales interacciones, vigilar y ajustar dosis

3: débil interacción, vigilar. 4: no interacciones

Basado en [www.hep-druginteractions.org](http://www.hep-druginteractions.org)

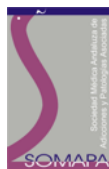

**Tabla 5: Interacciones entre AAD y drogas de abuso**

|                                       | EBR/GZR | GLE/PIB | SOF/LDV | SOF/VEL | SOF/VEL/VOX |
|---------------------------------------|---------|---------|---------|---------|-------------|
| Anfetaminas                           | 4       | 4       | 4       | 4       | 4           |
| Cannabis                              | 4       | 4       | 4       | 4       | 4           |
| Cocaína                               | 4       | 4       | 4       | 4       | 4           |
| Diamorfina                            | 4       | 4       | 4       | 4       | 4           |
| Extasis                               | 4       | 4       | 4       | 4       | 4           |
| GHB (Gammahidroxibutirato)            | 2       | 2       | 4       | 4       | 4           |
| Ketamina                              | 4       | 4       | 4       | 4       | 4           |
| LSD (Dietilamina del ácido Lisérgico) | 4       | 4       | 4       | 4       | 4           |
| Mefedrona                             | 4       | 4       | 4       | 4       | 4           |

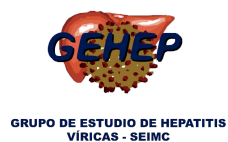

|                    |   |   |   |   |   |
|--------------------|---|---|---|---|---|
| Metanfetamina      | 4 | 4 | 4 | 4 | 4 |
| PCP (fenciclidina) | 4 | 4 | 4 | 4 | 4 |

1: no recomendado 2: potenciales interacciones, vigilar y ajustar dosis

3: débil interacción, vigilar. 4: no interacciones

Basado en [www.hep-druginteractions.org](http://www.hep-druginteractions.org)



**Tabla 6: Interacciones entre AAD y fármacos de uso común**

|                       |                                                                                                                                                                               | EBR/GZR | GLE/PIB | SOF/LDV | SOF/VEL | SOF/VEL/VOX |
|-----------------------|-------------------------------------------------------------------------------------------------------------------------------------------------------------------------------|---------|---------|---------|---------|-------------|
| <b>ANALGÉSICOS</b>    | Aspirina, Celecoxib,<br>Dexketoprofeno, Diclofenaco,<br>Etoricoxib, Ibuprofeno,<br>Indometacina, Ketoprofeno,<br>Meloxicam, Naproxeno,<br>Paracetamol, Piroxicam,<br>Tramadol | 4       | 4       | 4       | 4       | 4           |
|                       | Metamizol                                                                                                                                                                     | 2       | 2       | 4       | 2       | 2           |
|                       | Fentanilo                                                                                                                                                                     | 2       | 2       | 2       | 4       | 4           |
|                       | Oxicodona                                                                                                                                                                     | 2       | 2       | 4       | 4       | 4           |
| <b>ANTIARRÍTMICOS</b> | Flecainida, Lidocaina,                                                                                                                                                        | 4       | 4       | 4       | 4       | 4           |



|                     |                                                                                                                |   |   |   |   |   |
|---------------------|----------------------------------------------------------------------------------------------------------------|---|---|---|---|---|
|                     | Propafenona                                                                                                    |   |   |   |   |   |
|                     | Amiodarona                                                                                                     | 2 | 2 | 1 | 1 | 1 |
|                     | Digoxina                                                                                                       | 4 | 2 | 2 | 2 | 2 |
|                     | Dronedarona                                                                                                    | 2 | 2 | 1 | 1 | 1 |
| <b>ANTIBIÓTICOS</b> | Aminoglucósidos,<br>Betalactámicos, Quinolonas,<br>Cotrimoxazol, Glucopéptidos,<br>Clindamicina, Metronidazol. | 4 | 4 | 4 | 4 | 4 |
|                     | Claritromicina                                                                                                 | 4 | 3 | 4 | 4 | 3 |
|                     | Eritromicina                                                                                                   | 4 | 2 | 4 | 4 | 2 |
|                     | Telitromicina                                                                                                  | 2 | 2 | 2 | 4 | 2 |
|                     | Isoniacida                                                                                                     | 3 | 3 | 3 | 3 | 3 |
|                     | Rifampicina y Rifabutina                                                                                       | 1 | 1 | 1 | 1 | 1 |



|                        |                                                                                                                                           |   |   |   |   |   |
|------------------------|-------------------------------------------------------------------------------------------------------------------------------------------|---|---|---|---|---|
|                        | Rifaximina                                                                                                                                | 2 | 2 | 4 | 4 | 2 |
| <b>ANTICOAGULANTES</b> | Acenocumarol                                                                                                                              | 4 | 2 | 4 | 4 | 4 |
|                        | Apixaban, Rivaroxaban,<br>Ticagrelor, Warfarina                                                                                           | 2 | 2 | 2 | 2 | 2 |
|                        | Dabigatran                                                                                                                                | 2 | 1 | 2 | 2 | 1 |
|                        | Edoxaban                                                                                                                                  | 2 | 2 | 2 | 2 | 1 |
| <b>ANTIEPILÉPTICOS</b> | Clonazepan, Etosuximida,<br>Gabapentina, Lacosamida,<br>Lamotrigina, Levetiracetam,<br>Pregabalina, Topiramato,<br>Valproato, Vigabatrina | 4 | 4 | 4 | 4 | 4 |
|                        | Carbamacepina,<br>Oxcarbamacepina, Fenobarbital,                                                                                          | 1 | 1 | 1 | 1 | 1 |



|                        |                                                                                                                                                                        |   |   |   |   |   |
|------------------------|------------------------------------------------------------------------------------------------------------------------------------------------------------------------|---|---|---|---|---|
|                        | Fenitoina                                                                                                                                                              |   |   |   |   |   |
| <b>ANTIDIABÉTICOS</b>  | Acarbosa, Alogliptina,<br>Dulaglutide, Exenatide Glicacida,<br>Linagliptina, Liraglutide,<br>Metformina, Pioglitazona,<br>Rosiglitazona, Saxagliptina,<br>Sitagliptina | 4 | 4 | 4 | 4 | 4 |
|                        | Glibenclamida                                                                                                                                                          | 4 | 2 | 4 | 4 | 4 |
|                        | Repaglinida                                                                                                                                                            | 4 | 2 | 4 | 3 | 2 |
|                        | Vidagliptina                                                                                                                                                           | 4 | 3 | 4 | 4 | 2 |
| <b>ANTIISTAMÍNICOS</b> | Desloratadina, Difenidramina,<br>Hidroxizina, Levoceterizina,<br>Loratadina                                                                                            | 4 | 4 | 4 | 4 | 4 |



|                            |                                                                                   |   |   |   |   |   |
|----------------------------|-----------------------------------------------------------------------------------|---|---|---|---|---|
|                            | Astemizol, Terfenadina                                                            | 4 | 2 | 4 | 4 | 4 |
| ANTICONCEPTIVOS            | Desogestrel, Dienogest,<br>Drospirenona, Noretisterona                            | 4 | 4 | 4 | 4 | 4 |
|                            | Estradiol                                                                         | 4 | 3 | 4 | 3 | 3 |
|                            | Etinilestradiol                                                                   | 4 | 1 | 4 | 4 | 1 |
| ANTAGONISTAS DEL<br>CALCIO | Felodipino, Nicardipino,<br>Nifedipino                                            | 4 | 4 | 4 | 4 | 4 |
|                            | Amlodipino                                                                        | 4 | 4 | 2 | 4 | 4 |
|                            | Diltiazem                                                                         | 4 | 2 | 2 | 2 | 2 |
|                            | Verapamilo                                                                        | 4 | 2 | 4 | 4 | 2 |
| ANTIRRETROVIRALES          | Abacavir, Emtricitabina (FTC),<br>Lamivudina, Tenofovir<br>alafenamida (TAF)/FTC, | 4 | 4 | 4 | 4 | 4 |



|                        |                                                                 |   |   |   |   |   |
|------------------------|-----------------------------------------------------------------|---|---|---|---|---|
|                        | Rilpivirina, Maraviroc, Bictegravir, Dolutegravir, Raltegravir, |   |   |   |   |   |
|                        | Tenofovir (TDF)                                                 | 4 | 4 | 2 | 2 | 2 |
|                        | Efavirenz                                                       | 1 | 1 | 2 | 1 | 1 |
|                        | Etravirina, Nevirapina                                          | 1 | 1 | 4 | 1 | 1 |
|                        | Elvitegravir/Cobicistat/FTC/TDF                                 | 1 | 4 | 2 | 2 | 2 |
|                        | Elvitegravir/Cobicistat/FTC/TAF                                 | 1 | 4 | 4 | 4 | 4 |
|                        | Darunavir/Cobicistat                                            | 1 | 1 | 2 | 4 | 2 |
|                        | Darunavir/Ritonavir                                             | 1 | 1 | 4 | 4 | 2 |
|                        | Atazanavir/Cobicistat                                           | 1 | 1 | 2 | 4 | 1 |
|                        | Atazanavir/Ritonavir                                            | 1 | 1 | 4 | 4 | 1 |
| <b>BETABLOQUEANTES</b> | Atenolol, Bisoprolol, Labetalol, Nevibolol, Propanolol, Sotalol | 4 | 4 | 4 | 4 | 4 |

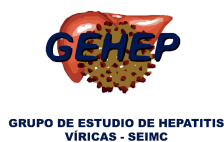

|                                             |                                                  |   |   |   |   |   |
|---------------------------------------------|--------------------------------------------------|---|---|---|---|---|
|                                             | Carvedilol                                       | 4 | 2 | 2 | 2 | 2 |
| <b>INHIBIDORES DE LA SECRECIÓN GÁSTRICA</b> | Esomeprazol, Famotidina,                         | 4 | 2 | 2 | 2 | 2 |
|                                             | Lansoprazol,                                     |   |   |   |   |   |
|                                             | Omeprazol, Pantoprazol, Rabeprazol,              |   |   |   |   |   |
|                                             | Ranitidina                                       |   |   |   |   |   |
| <b>ESTATINAS</b>                            | Atorvastatina, Lovastatina, Simvastatina         | 2 | 1 | 2 | 2 | 1 |
|                                             | Ezetimibe                                        | 4 | 2 | 4 | 4 | 2 |
|                                             | Pitavastatina                                    | 4 | 2 | 2 | 2 | 1 |
|                                             | Pravastatina                                     | 4 | 2 | 2 | 4 | 2 |
|                                             | Rosuvastatina                                    | 2 | 2 | 1 | 2 | 1 |
| <b>ANTIHIPERTENSIVOS</b>                    | Captopril, Clorotiazida, Doxazosina, Eprosartan, | 4 | 4 | 4 | 4 | 4 |



|                         |                                                                                                                              |   |   |   |   |   |
|-------------------------|------------------------------------------------------------------------------------------------------------------------------|---|---|---|---|---|
|                         | Espironolactona, Fosinopril,<br>Furosemida, Hidroclorotizida,<br>Ivabridina, Lisinopril, Losartan,<br>Perindopril, Ramipril. |   |   |   |   |   |
|                         | Candesartan                                                                                                                  | 3 | 3 | 4 | 4 | 3 |
|                         | Enalapril                                                                                                                    | 4 | 2 | 4 | 4 | 2 |
|                         | Olmesartan y Telmisartan                                                                                                     | 4 | 2 | 4 | 4 | 2 |
|                         | Valsartan                                                                                                                    | 4 | 4 | 4 | 4 | 2 |
| <b>INMUNOSUPRESORES</b> | Azatioprina, Basiliximab,<br>Eculizumab, Etanercept,<br>Micofenolato.                                                        | 4 | 4 | 4 | 4 | 4 |
|                         | Ciclosporina                                                                                                                 | 1 | 2 | 4 | 4 | 1 |
|                         | Sirolimus, Tacrolimus                                                                                                        | 2 | 2 | 4 | 4 | 2 |

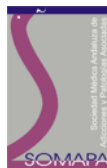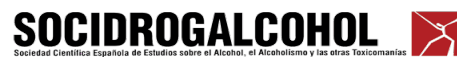

1: no recomendado 2: potenciales interacciones, vigilar y ajustar dosis

3: débil interacción, vigilar. 4: no interacciones

Basado en; [www.hep-druginteractions.org](http://www.hep-druginteractions.org)

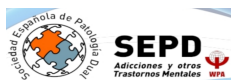

### **13. REDUCCIÓN DE RIESGO Y PREVENCIÓN DE LA REINFECCIÓN POR VHC**

La infección por el VHC se transmite por vía parenteral (Tabla 7). El modo de propagación más frecuente es el uso de sustancias por vía intravenosa con material no esterilizado (cánulas, agujas o instrumentos de inyección contaminados). Otras vías de infección son los *piercings*, tatuajes o acupuntura con materiales contaminados. La vía sexual es muy poco eficaz para transmitir el VHC, salvo cuando se dan circunstancias como la coinfección por VIH o sexo anal con sangrado. Con menor frecuencia en la actualidad en España, puede producirse transmisión en entornos sanitarios, por reutilización o esterilización inadecuada de material de uso parenteral, aunque esta fue la vía más común de adquisición de la infección por VHC en nuestro medio antes de 1985. El riesgo de transmisión del VHC desde la madre gestante al recién nacido oscila entre el 2%-10%.

#### **Reducción de riesgo**

La prevención de la infección VHC debe realizarse a través de programas especialmente adaptados a las diferentes situaciones de vulnerabilidad (Tabla 8).



## ***Consumo de sustancias psicoactivas***

El consumo de sustancias intravenosas es el mayor factor de riesgo para la infección por VHC en España actualmente. Entre el 50%-80% de los UDVP están infectados de VHC (74,75). En España, unas 100.000 personas consumen opiáceos, muchas de ellas con historial de uso intravenoso (76) y cerca del 90% están en TSO, principalmente con metadona (77). Se calcula que alrededor el 30% de los consumidores continúan inyectándose drogas (78,79).

El TSO con metadona o buprenorfina está asociado con una disminución del riesgo de transmisión de la infección por VHC (80,81), ya que facilitan el abandono del consumo de opiáceos por vía intravenosa (77,79,82,83). Además, aquellos consumidores que no tratan su adicción tienen más dificultades para acceder al tratamiento del VHC (84).

A las personas que continúan consumiendo drogas ilegales se les recomienda no utilizar la vía intravenosa. Si persisten utilizando esta vía, deben emplear jeringuillas de un solo uso. Los PIJs estériles a cambio de las ya usadas son muy eficaces como estrategia de disminución de riesgos (85). Las actividades fundamentales que se llevan a cabo en los PIJs son la distribución de material de



inyección estéril (jeringuillas, toallitas de alcohol, agua para inyección, etc.) y preservativos, así como recogida y eliminación de las jeringuillas usadas. También se les proporciona a los usuarios información, educación sanitaria y consejo. Además se derivan a los que lo requieran y lo deseen a otros recursos socio-sanitarios existentes en el área de actuación del programa. Para situaciones en las que el UDVP no consiga jeringuillas estériles a tiempo, se les puede instruir sobre la desinfección de las ya usadas con agua y lejía.

El hábito de compartir material para esnifar o inhalar cocaína u otras sustancias también puede ser un factor de riesgo, al producir erosión de mucosas, hemorragias y exposición a la sangre de los instrumentos que se emplean para la inhalación (86,87). Se recomienda que cada persona use su propio material cuando se comparta la sustancia.

También existe riesgo de transmisión parenteral del VHC al usar instrumentos que perforan la piel, tales como los usados en tatuajes, acupuntura o *piercings*, si no han sido adecuadamente esterilizados. Es necesario asegurarse de que se emplee material desechable de un solo uso. Aún con un riesgo de transmisión bajo, no se deberían compartir cepillos de dientes, cuchillas de afeitar, cortaúñas, depiladoras y otros instrumentos que puedan mancharse con sangre.



## ***Relaciones sexuales***

La transmisión sexual del VHC se ha descrito principalmente entre HSH que practican sexo anal sin protección, generalmente junto con ciertas prácticas sexuales como el *fisting*, el uso de juguetes sexuales y el sexo violento con sangrado. Es por ello que el uso de preservativo debe recomendarse para todas las relaciones sexuales entre HSH. Asimismo, deben desaconsejarse las prácticas que conllevan riesgo de sangrado.

El sexo ininterrumpido entre HSH durante días asociado a consumo de drogas, lo que se conoce como *chem-sex*, es una práctica de frecuencia creciente. Las sustancias utilizadas en el *chem-sex* son principalmente mefedrona, éxtasis y metanfetamina. Estas sustancias pueden, además, consumirse por vía intravenosa, usándose, a veces, material compartido. Lo habitual es que en estas fiestas sexuales en grupo no se utilice preservativo. La combinación de drogas-sexo disminuye la percepción de riesgo y lleva a no tomar medidas preventivas (88). La práctica de *chem-sex* sin uso de drogas parenterales es por sí misma una práctica de riesgo para adquirir el VHC. El riesgo de transmisión del VHC por vía sexual entre HSH es mayor cuando se encuentran infectados por VIH.



## ***Recomendaciones***

- Los usuarios de opiáceos en general, y especialmente aquellos que sean UDVP, deben integrarse en programas de TSO (AI).
- Los UDVP deben tener acceso a PIJ (AII). En caso de no tener acceso a un PIJ, deben ser instruidos sobre la limpieza de jeringuillas (AIII).
- Los usuarios de drogas inhaladas deben ser instruidos acerca de los riesgos de compartir el material de inhalación y recomendársele no compartirlo (AII).
- Los HSH deben ser informados sobre el riesgo del sexo en grupo asociado al consumo de drogas (AII). En ellos debe recomendarse la utilización sistemática de preservativos y evitar prácticas potencialmente asociadas a sangrado (AII), así como evitar la administración intravenosa de sustancias sin suficientes garantías de esterilidad (AII).



## **Reinfección por VHC. Cribado y prevención**

La eliminación de la infección por VHC por medio de tratamiento o espontáneamente no confiere protección frente a nuevas exposiciones al VHC. Por ello, toda persona con una infección por VHC resuelta, que mantenga hábitos de riesgo, debe ser vigilada tanto para intentar minimizar la probabilidad de reinfección, como para detectar la reinfección cuando se produzca. La prevención depende de la reducción del riesgo de exposición al virus en grupos como los UD y los HSH con las prácticas sexuales descritas anteriormente. En estos grupos de riesgo se debe recomendar, además de la interrupción de las prácticas de alto riesgo, la monitorización cada 12 meses del ARN del VHC plasmático.

### ***Recomendaciones***

- Las recomendaciones recogidas anteriormente para reducción de daños se aplicarían también a todas aquellas personas que hayan eliminado la infección por VHC, sea espontáneamente o con tratamiento, que mantengan hábitos de riesgo (All).

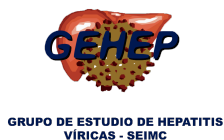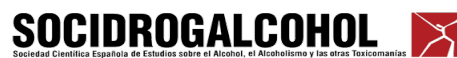

- Si se ha eliminado la infección por VHC y se mantienen hábitos de riesgo, debe determinarse la existencia de viremia por el nivel de ARN del VHC en plasma al menos anualmente (AII).

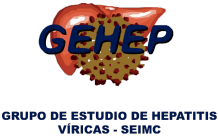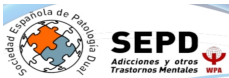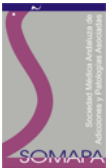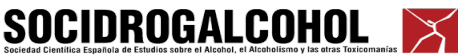

**Tabla 7.- Grupos de población con mayor riesgo de infección por el VHC**

|                                                                                                                                                       |
|-------------------------------------------------------------------------------------------------------------------------------------------------------|
| UDVP                                                                                                                                                  |
| UDVI                                                                                                                                                  |
| HSH, especialmente si existe infección por el VIH                                                                                                     |
| Reclusos o ex-reclusos                                                                                                                                |
| Personas con tatuajes, perforaciones ornamentales (piercings) o sometidos a maniobras con material punzante o cortante no adecuadamente esterilizado. |
| Receptores de productos sanguíneos infectados                                                                                                         |
| Tratados con material sanitario incorrectamente esterilizado                                                                                          |
| Niños nacidos de madres con VHC                                                                                                                       |
| Parejas sexuales estables de pacientes coinfectados por VIH y VHC                                                                                     |
| Pacientes hemodializados                                                                                                                              |
| Pacientes con infección por VIH y/o VHB                                                                                                               |

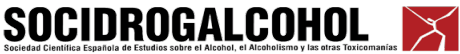

**Tabla 8.- Medidas generales de prevención en el paciente con infección por VHC**

|                                                                                                                                                                                     |
|-------------------------------------------------------------------------------------------------------------------------------------------------------------------------------------|
| Informar a las personas con hábitos de riesgo de las medidas que pueden protegerlos.                                                                                                |
| Evitar situaciones de alto riesgo en el uso de drogas, especialmente compartir el material de consumo.                                                                              |
| Cubrir todas las heridas abiertas.                                                                                                                                                  |
| No compartir objetos personales con posibilidad de contacto sangre-sangre o sangre-tejido, como cepillos de dientes, cuchillas de afeitar, tijeras de uñas, utensilios de manicura. |
| Utilizar siempre preservativo en las prácticas sexuales con riesgo de infección por VHC                                                                                             |
| Usar material esterilizado si se realizan tatuajes o perforaciones corporales (piercing)                                                                                            |



#### **14. REFERENCIAS BIBLIOGRÁFICAS**

1. World Health Organization. Global health sector strategy on viral hepatitis, 2016–2021: towards ending viral hepatitis. 2016. Available from <http://apps.who.int/iris/bitstream/10665/246177/1/WHO-HIV-2016.06-eng.pdf>. Accessed March 2018.
2. Monto A, Alonzo J, Watson JJ, Grunfeld C, Wright TL. Steatosis in chronic hepatitis C: Relative contributions of obesity, diabetes mellitus, and alcohol. *Hepatology* 2002;36:729–36.
3. Vidali M, Tripodi MF, Ivaldi A, Zampino R, Occhino G, Restivo L et al. Interplay between oxidative stress and hepatic steatosis in the progression of chronic hepatitis C. *J Hepatol* 2008; 48:399-406.
4. Hutchinson SJ, Bird SM, Goldberg DJ. Influence of alcohol on the progression of hepatitis C virus infection: a meta-analysis. *Clin Gastroenterol Hepatol* 2005;3:1150-9.
5. Kelly EM, Dodge JL, Bacchetti P, Sarkar M, French AL, Tien PC. moderate alcohol use is not associated with fibrosis progression in human immunodeficiency virus/hepatitis C virus-coinfected women: a prospective cohort study. *Clin Infect Dis* 2017;65:2050-6.
6. Schwarzingler M, Baillot S, Yazdanpanah Y, Rehm J, Mallet V. Contribution of alcohol use disorders on the burden of chronic hepatitis C in France,



- 2008-2013: A nationwide retrospective cohort study. *J Hepatol* 2017;67:454-61.
7. Brunet L, Moodie EE, Rollet K, Cooper C, Walmsley S, Potter M, et al. Marijuana smoking does not accelerate progression of liver disease in HIV-hepatitis C coinfection: a longitudinal cohort analysis. *Clin Infect Dis* 2013;57:663-70.
8. Hézode C, Zafrani ES, Roudot-Thoraval F, Costentin C, Hessami A, Bouvier-Alias M, et al. Daily cannabis use: a novel risk factor of steatosis severity in patients with chronic hepatitis C. *Gastroenterology* 2008;134:432-9.
9. Ishida JH, Peters MG, Jin C, Louie K, Tan V, Bacchetti P, et al. Influence of cannabis use on severity of hepatitis C disease. *Clin Gastroenterol Hepatol* 2008;6:69-75.
10. Rehm J, Frick U, Hartwig C, Gutzwiller F, Gschwend P, Uchtenhagen A. Mortality in heroin-assisted treatment in Switzerland 1994-2000. *Drug Alcohol Depend*. 2005;79:137-43.
11. Garriga C, Manzanares-Laya S, García de Olalla P, Gorrindo P, Lens S, Solà R, et al. Evolution of acute hepatitis C virus infection in a large European city: Trends and new patterns. *PLoS One* 2017 Nov 14;12(11):e0187893.



12. Rivas I, Martinez E, Sanvisens A, Bolao F, Tor J, Torrens M, et al. Hepatitis B virus serum profiles in injection drug users and rates of immunization over time in Barcelona: 1987-2006. *Drug Alcohol Depend* 2010;110:234-9.
13. Shah DP, Grimes CZ, Nguyen AT, Lai D, Hwang LY. Long-term effectiveness of accelerated hepatitis B vaccination schedule in drug users. *Am J Public Health* 2015;105:e36-43.
14. Procedimiento SEIMC: Diagnóstico microbiológico de las hepatitis víricas. <http://www.seimc.org/contenidos/documentoscientificos/procedimientosmicrobiologia/seimc-procedimientomicrobiologia50.pdf>\_(Consultada 15.01.18)
15. Grebely J, Applegate TL, Cunningham P, Feld JJ. Hepatitis C point-of-care diagnostics: in search of a single visit diagnosis. *Expert Review of Molecular Diagnostics* 2017; 17: 1109-1115
16. Grebely J, Lamoury FMJ, Hajarizadeh B, Mowat Y, Marshall AD, Bajis S, et al; LiveRLife Study Group. Evaluation of the Xpert HCV viral load point-of-care assay from venepuncture-collected and finger-stick capillary whole-blood samples: a cohort study. *Lancet Gastroenterol Hepatol* 2017; 2: 514-520.
17. European Association for the Study of the Liver. EASL Recommendations on Treatment of Hepatitis C 2016. *J Hepatol* 2017; 66:153-194.



18. Alados JC, Guerrero IP, Rodríguez MJB, Martos ET, Pérez AB, León CC et al. Hepatitis C virus core antigen in the management of patients treated with new direct-acting antivirals. *Diagn Microbiol Infect Dis* 2017; 89:2 9-34
19. Aguilera A, Navarro D, Rodríguez-Frias F, Viciano I, Martínez-Sapiña A, Rodríguez MJ et al. Prevalence and distribution of hepatitis C virus genotypes in Spain during the 2000-2015 period (The GEHEP 005 study). *J Viral Hepat* 2017; 24: 725-732
20. Sarrazin C, Isakov V, Svarovskaia ES, Hedskog C, Martin R, Chodavarapu K, et al. Late Relapse Versus Hepatitis C Virus Reinfection in Patients With Sustained Virologic Response After Sofosbuvir-Based Therapies. *Clin Infect Dis* 2017; 64: 44-52.
21. Casas P, Viciano I, Montiel N, Luzón P, De la Iglesia A, Freyre-Carrillo et al. Pacientes con serología de hepatitis C positiva que no acceden a valoración para tratamiento: análisis de la situación en Andalucía en 2016. XXX Reunión SAMPAC; Baeza, Octubre 2017.
22. Smith BD, Morgan RL, Beckett GA, Falck-Ytter Y, Holtzman D, Teo CG, et al. Recommendations for the identification of chronic hepatitis C virus infection among persons born during 1945-1965. *MMWR Recomm Rep* 2012; 61: 1-32.
23. Casas P, Navarro D, García F, Costa JJ, Aguilera A, García F. Diagnóstico tradicional versus diagnóstico en un solo paso del virus de la hepatitis C.



Estudio piloto en dos centros asistenciales. *Enf Infecc Microb Clin* 2018;  
En prensa.

24. World Health Organization. Guidelines for the screening, care and treatment of persons with hepatitis C infection. April 2014. <http://www.who.int/hiv/topics/hepatitis/en/>. (Consultada 15.01.18)
25. Buti M, Dominguez-Hernandez R, Casado MA, Sabater E, Esteban R. El cribado y tratamiento del virus de la hepatitis C en población general española entre 20 y 79 años de edad es coste efectivo. 43 Congreso de la AEEH. Madrid, Febrero 2018. *Gastroenterol Hepatol* 2018; 41 (SE1): 96.
26. Pineda J.A, Neukam K. Hepatitis aguda C en varones homosexuales infectados por VIH: ¿una segunda oleada de coinfección por VIH y VHC? *Enferm Infecc Microbiol Clin* 2015;33:1–2
27. Aaron S, Mc Mahon JM, Milano D, Torres L, Clatts M, Tortu S, et al. Intranasal Transmission of hepatitis C virus: virological and clinical evidence. *Clin Infect Dis* 2008; 47: 931-93.
28. Soulier A, Poiteau L, Rosa I, Hézode C, Roudot-Thoraval F, Pawlotsky JM et al. Dried blood spots: a tool to ensure broad access to hepatitis C screening, diagnosis, and treatment monitoring. *J Infect Dis* 2016; 213: 1087–1095.
29. Iversen J, Grebely J, Catlett B, Cunningham P, Dore GJ, Maher L. Estimating the cascade of hepatitis C testing, care and treatment among



- people who inject drugs in Australia. *International Journal of Drug* 2017; 47:77-85.
30. Dimova RB, Zeremski M, Jacobson IM, Hagan H, Des Jarlais DC, Talal AH. Determinants of hepatitis C virus treatment completion and efficacy in drug users assessed by metanalysis. *Clin Infect Dis* 2013; 56: 806-16
31. Blackburn NA, Patel RC, Zibbell JE. Improving screening methods for hepatitis C among people who inject drugs: Findings form the HepTLC initiative, 2012-2014. *Public Health reports* 2016 (Suppl 2); 131: 91-7
32. Evon DM, Simpson K, Kixmiller S, Galanko J, Dougherty K, Golin C et al. A randomized controlled trial of an integrated care intervention to increase eligibility for chronic hepatitis C treatment. *American Journal of Gastroenterology* 2011; 106: 1777- 86.
33. Zhou K, Fitzpatrick T, Walsh N, Kim JY, Chou R, Lackey M et al. Interventions to optimise the care continuum for chronic viral hepatitis: A systematic review and meta-analyses. *The Lancet infectious diseases* 2016; 16: 1409-22.
34. Masson CL, Delucchi KL, McKinight C et al. A randomized trial of a hepatitis care coordination model in methadone maintenance treatment. *Am J Public Health* 2013; 103: e81-e88.
35. Farrisi D, Dietz N. Patient navigation is a client-centered approach that helps to engage people in HIV care. *HIV Clin* 2013; 25: 1-3.



36. Cooper CL, Hatashita H, Corsi DJ, Parmar P, Corrin R and Garber G.  
Direct-Acting Antiviral Therapy Outcomes in Canadian Chronic Hepatitis C Telemedicine Patients. *Annals of Hepatology* 2017; 16: 874-80
37. Arora S, Thornton K, Murata G, Deming P, Kalishman S, Denise D, et al.  
Outcomes of hepatitis C treatment by primary care providers. *N Engl J Med* 2011; 364: 2199-207
38. Alavi M, Grebely J, Micallef M, Dunlop AJ, Balcomb AC, Day CA et al.  
Assesment and treatment of hepatitis C virus infection among people who inject drugs in the opioid substitution setting: ETHOS Study. *Clin Infect Dis* 2013; 57 (Suppl2): S62-69.
39. van der Meer AJ, Veldt BJ, Feld JJ, Wedemeyer H, Dufour JF, Lammert F, et al. Association between sustained virological response and all-cause mortality among patients with chronic hepatitis C and advanced hepatic fibrosis. *JAMA* 2012; 308:2584-93.
40. Morgan RL, Baack B, Smith BD, Yartel A, Pitasi M, Falck-Ytler Y.  
Eradication of hepatitis C virus infection and the development of hepatocellular carcinoma: a meta-analysis of observational studies. *Ann Intern Med* 2013; 158:329-37.
41. Backus LI, Boothroyd DB, Phillips BR, Belperio P, Halloran J, Mole LA. A sustained virologic response reduces risk of all cause mortality in patients with hepatitis C. *Clin Gastroenterol Hepatol* 2011; 9:509-16.



42. Martin NK, Vickerman P, Grebely J, Hellard M, Hutchinson SJ, Lima VD, et al. Hepatitis C virus treatment for prevention among people who inject drugs: Modeling treatment scale-up in the age of direct-acting antivirals. *Hepatology* 2013; 58:1598-609.
43. Aspinall EJ, Corson S, Doyle JS, Grebely J, Hutchinson SJ, Dore GJ, et al. Treatment of hepatitis C virus infection among people who are actively injecting drugs: a systematic review and meta-analysis. *Clin Infect Dis* 2013; 57(Suppl 2):S80-9.
44. Téllez F, Macías J, Morano L, Granados R, Rivero-Juárez A, Palacios R, et al. Respuesta a antivirales de acción directa sin interferón en usuarios activos de drogas infectados por el VHC: Cohortes HEPVIR y GEHEP-MONO. III Congreso Nacional del Grupo Español para el Estudio de las Hepatitis Víricas (GEHEP) 2017. 28-30 septiembre, Sevilla, España. Abstract PO-36.
45. Zeuzem S, Ghalib R, Reddy KR, Pockros PJ, Ari ZB, Zhao Y, et al. Grazoprevir-Elbasvir combination therapy for treatment-naive cirrhotic and noncirrhotic patients with chronic hepatitis C virus genotype 1, 4, or 6 infection: A randomized trial. *Ann Intern Med* 2015; 163:1-13.
46. Dore GJ, Altice F, Litwin AH, Dalgard O, Gane EJ, Shibolet O, et al. Elbasvir-Grazoprevir to treat hepatitis C virus infection in persons receiving



- opioid agonist therapy: A randomized trial. *Ann Intern Med* 2016; 165:625-34.
47. Zeuzem S, Foster GR, Wang S, Asatryan A, Gane E, Feld JJ, et al. Glecaprevir-Pibrentasvir for 8 or 12 weeks in HCV genotype 1 or 3 infection. *N Engl J Med* 2018; 378:354-69.
48. Forns X, Lee SS, Valdes J, Lens S, Ghalib R, Aguilar H, et al. Glecaprevir plus pibrentasvir for chronic hepatitis C virus genotype 1, 2, 4, 5, or 6 infection in adults with compensated cirrhosis (EXPEDITION-1): a single-arm, open-label, multicentre phase 3 trial. *Lancet Infect Dis* 2017; 17:1062-8.
49. Rockstroh J, Lacombe K, Viani RM, Orkin C, Wyles D, Luetkemeyer A, et al. Efficacy and safety of Glecaprevir/Pibrentasvir in patients co-infected with hepatitis C virus and human immunodeficiency virus-1: the EXPEDITION-2 Study. The International Liver Congress 2017. April 19-23, Amsterdam, Holanda. Abstract LBP-522.
50. Afdhal NH, Zeuzem S, Kwo PY, Chojkier M, Gitlin N, Puoti M, et al. Ledipasvir and sofosbuvir for untreated HCV genotype 1 infection. *N Engl J Med* 2014; 370:1889-98.
51. Kowdley KV, Gordon SC, Reddy KR, Rossaro L, Bernstein DE, Lawitz EJ, et al. Ledipasvir and sofosbuvir for 8 or 12 weeks for chronic HCV without cirrhosis. *N Engl J Med* 2014; 370:1879-88.



52. Kowdley KV, Sundaram V, Jeon CY, Qureshi K, Latt NL, Sahota A, et al. Eight weeks of ledipasvir/sofosbuvir is effective for selected patients with genotype 1 hepatitis C virus infection. *Hepatology* 2017; 65:1094-103.
53. Merino D, Macías J, Téllez F, Granados R, Morano L, Delgado M, et al. Respuesta en la vida real a Sofosbuvir/Ledipasvir 8 o 12 semanas en pacientes mono infectados por VHC o coinfectados por VIH/VHC. III Congreso Nacional del Grupo Español para el Estudio de las Hepatitis Viricas (GEHEP) 2017. 28-30 septiembre, Sevilla, España. Abstract OR-03.
54. Feld JJ, Jacobson IM, Hézode C, Asselah T, Ruane PJ, Gruener N, et al. Sofosbuvir and Velpatasvir for HCV Genotype 1, 2, 4, 5, and 6 Infection. *N Engl J Med* 2015; 373:2599-607.
55. Jacobson IM, Lawitz E, Gane EJ, Willems BE, Ruane PJ, Nahass RG, et al. Efficacy of 8 Weeks of Sofosbuvir, Velpatasvir, and Voxilaprevir in patients with chronic HCV infection: 2 phase 3 randomized trials. *Gastroenterology* 2017; 153:113-22.
56. Grebely J, Dalgard O, Conway B, Cunningham EB, Bruggmann P, Hajarizadeh B, et al. Sofosbuvir and velpatasvir for hepatitis C virus infection in people with recent injection drug use (SIMPLIFY): an open-label, single-arm, phase 4, multicentre trial. *Lancet Gastroenterol Hepatol*



- 2018 Jan 5. pii: S2468-1253(17)30404-1. doi: 10.1016/S2468-1253(17)30404-1. (Epub ahead of print).
57. Asselah T, Kowdley KV, Zadeikis N, Wang S, Hassanein T, Horsmans Y, et al. Efficacy of Glecaprevir/Pibrentasvir for 8 or 12 weeks in patients with hepatitis C virus genotype 2, 4, 5, or 6 infection without cirrhosis. Clin Gastroenterol Hepatol 2017 Sep 22. pii: S1542-3565(17)31162-X. doi: 10.1016/j.cgh.2017.09.027. (Epub ahead of print).
58. Foster GR, Afdhal NH, Roberts SK. Sofosbuvir and Velpatasvir for HCV Genotype 2 and 3 Infection. N Engl J Med 2015; 373:2608-17.
59. Kwo PY, Wyles DL, Wang S, Poordad F, Gane E, Maliakkal B, et al. 100% SVR4 with ABT-493 and ABT-530 with or without ribavirin in treatment-naïve HCV genotype 3-infected patients with cirrhosis. J Hepatol 2016; 64:S208.
60. Asselah T, Reesink HW, Gerstoft J, de Ledinghen V, Pockros P, Robertson M, et al. High Efficacy of Elbasvir and Grazoprevir with or without ribavirin in 103 treatment-naive and experienced patients with HCV genotype 4 infection: A pooled analysis. 66th Annual Meeting of the American Association for the Study of Liver Diseases (AASLD) 2015. Boston, EEUU. Abstract 251.
61. Asselah T, Reesink H, Gerstoft J, de Ledinghen V, Pockros PJ, Robertson M, et al. Efficacy of elbasvir and grazoprevir in participants with hepatitis C



- virus genotype 4 infection: a pooled analysis. *Liver Int* 2018 Feb 20. doi: 10.1111/liv.13727. (Epub ahead of print).
62. Puoti M, Foster GR, Wang S, Mer DM, Gane E, Moreno C, et al. High SVR Rates With Eight and Twelve Weeks of Pangenotypic Glecaprevir/Pibrentasvir: Integrated Efficacy Analysis of Genotype 1-6 Patients Without Cirrhosis. The International Liver Congress 2017. Abril 19-23, Amsterdam, Holanda. Abstract SAT-233.
63. Smolders EJ, Smit C, de Kanter C, Dofferhoff A, Arends JE, Brinkman K, et al. Management of drug interactions with direct-acting antivirals in Dutch HIV/hepatitis C virus-coinfected patients: adequate but not perfect. *HIV Med* 2017 Dec 1. doi: 10.1111/hiv.12570
64. Soriano V, Labarga P, Fernandez-Montero JV, Mendoza C, Benítez-Gutiérrez L, Peña JM, et al. Drug interactions in HIV-infected patients treated for hepatitis C. *Expert Opin Drug Metab Toxicol* 2017; 13:807-16.
65. Kondili LA, Gaeta GB, Leluzzi D, Zignego AL, Monti M, Gori A, et al. Real-life data on potential drug-drug interactions in patients with chronic hepatitis C viral infection undergoing antiviral therapy with interferon-free DAAs in the PITER Cohort Study. *PLoS One* 2017; 12: e0172159.
66. Scavone C, Sportiello L, Rafaniello C, Mascolo A, Sessa M, Rossi F et al. New era in treatment options of chronic hepatitis C: focus on safety of new direct-acting antivirals (DAAs). *Expert Opin Drug Saf* 2016; 15:85-100.



67. Talavera Pons S, Boyer A, Lamblin G, Chennell P, Châtenet FT, Nicolas C et al. Managing drug-drug interactions with new direct-acting antiviral agents in chronic hepatitis C. *Br J Clin Pharmacol* 2017; 83:269-93.
68. Papatheodoridi M, Dalekos GN, Goulis J, Manolakopoulos S, Triantos C, Zachou K et al. Prioritization for interferon-free regimens and potential drug interactions of current direct-acting anti-hepatitis C agents in routine clinical practice. *Ann Gastroenterol* 2017; 30:542-9.
69. Geddawy A, Ibrahim YF, Elbahie NM, Ibrahim MA. Direct Acting Anti-hepatitis C Virus Drugs: Clinical Pharmacology and Future Direction. *J Transl Int Med* 2017; 31:8-17.
70. Chan J, Chung RT. Perspectives on HCV: Current Therapeutic Regimens and Drug-Drug Interactions. *Clin Pharmacol Drug Dev* 2017; 6:147-63.
71. Álvarez JF. Fundamentos Farmacológicos. En: Roncero C, Casas M, editores. *Patología Dual. Fundamentos clínicos y terapéuticos*. Ed. Marge. Barcelona. 2016: p. 43-55.
72. University of Liverpool HEP-interactions <http://hep-druginteractions.org> (accedido 01-3-2018)
73. Höner Zu Siederdisen C, Maasoumy B, Marra F, Deterding K, Port K, et al. Drug-Drug Interactions With Novel All Oral Interferon-Free Antiviral Agents in a Large Real-World Cohort. *Clin Infect Dis* 2016; 1:561-7.



74. Nelson PK, Mathers BM, Cowie B, Hagan H, des Jarlais D, Horyniak D, et al. Global epidemiology of hepatitis B and hepatitis C in people who inject drugs: results of systematic reviews. *Lancet* 2011; 378:571–83.
75. Muga R, Zuluaga P, Sanvisens A, Rivas I, Fuster D, Bolao F, Tor J. Hepatitis C associated to substance abuse: ever closer to a treatment without Interferon. *Adicciones* 2015; 27:141–9.
76. OEDT. Informe 2016: alcohol, tabaco y drogas ilegales en España. [http://www.pnsd.msssi.gob.es/profesionales/sistemasInformacion/informesEstadisticas/pdf/2016\\_INFORME\\_OEDT.pdf](http://www.pnsd.msssi.gob.es/profesionales/sistemasInformacion/informesEstadisticas/pdf/2016_INFORME_OEDT.pdf). [Consultada 03-02-18].
77. Torrens M, Fonseca F, Castillo C, Domingo-Salvany A. Methadone maintenance treatment in Spain: the success of a harm reduction approach. *Bulletin of the World Health Organization* 2013; 91:136–41.
78. Vallejo F, Barrio G, Brugal MT, Pulido J, Toro C, Sordo L, et al. High hepatitis C virus prevalence and incidence in a community cohort of young heroin injectors in a context of extensive harm reduction programmes. *J Epidemiol Community Health* 2015; 69:599–603.
79. Roncero C, Fuste G, Barral C, Rodríguez-Cintas L, Martínez-Luna N, José E, et al.. Therapeutic management and comorbidities in opiate-dependent patients undergoing a replacement therapy programme in Spain: the PROTEUS study. *Heroin Addict Relat Clin Probl* 2011;13:5-16.



80. Hagan H, Pouget ER, des Jarlais DC. A systematic review and meta-analysis of interventions to prevent hepatitis C virus infection in people who inject drugs. *J Infect Dis* 2011; 204:74–83.
81. Nolan S, Dias Lima V, Fairbairn N, Kerr T, Montaner J, Grebely J, et al. The impact of methadone maintenance therapy on hepatitis C incidence among illicit drug users. *Addiction* 2014; 109:2053–9.
82. Perlman DC, Jordan AE, Uskula A, Huong DT, Masson CL, Schackman BR, et al. An international perspective on using opioid substitution treatment to improve hepatitis C prevention and care for people who inject drugs: structural barriers and public health potential. *Int J Drug Policy* 2015; 26:1056–63.
83. Taylor LE, Maynard MA, Friedmann PD, Macleod CJ, Rich JD, Flanigan TP, et al. Buprenorphine for human immunodeficiency virus/hepatitis C virus-coinfected patients: Does it serve as a bridge to hepatitis C virus therapy? *Journal Addiction Medicine* 2012; 6:179–85.
84. Roncero C, Vega P, Martínez-Raga J, Torrens M. Hepatitis C crónica y usuarios con un historial de inyección de drogas en España: evaluación de la población, retos para un tratamiento efectivo. *Adicciones* 2017; 29:71-3.
85. MacArthur GJ, van Velzen E, Palmateer N, Kimber J, Pharris A, Hope V, et al. Interventions to prevent HIV and Hepatitis C in people who inject drugs: a review of reviews to assess evidence of effectiveness. *Int J Drug Policy*



2014; 25:34-52.

86. Chitwood DD, Comerford M, Sanchez J. Prevalence and risk factors for HIV among sniffers, short-term injectors, and long-term injectors of heroin. J Psychoactive Drugs 2003; 35:445-53.
87. Macías J, Palacios RB, Claro E, Vargas J, Vergara S, Mira JA, et al. High prevalence of hepatitis C virus infection among noninjecting drug users: association with sharing the inhalation implements of crack. Liver Int 2008; 28:781-786.
88. van de Laar T, Matthews GV, Prins M, Danta M. Acute hepatitis C in HIV-infected men who have sex with men: an emerging sexually transmitted infection AIDS 2010; 24:1799-812.
